# Supplementary material for: Comparative Genomic Analysis of Xanthomonas campestris pv. campestris Isolates BJSJQ20200612 and GSXT20191014 Provides Novel Insights Into Their Genetic Variability and Virulence
Source: Front Microbiol. 2022 Mar 2;13:833318. doi: 10.3389/fmicb.2022.833318 (PMC8924526; doi:10.3389/fmicb.2022.833318)
Supplement: Supplementary file 9 [file Table_7.XLSX]

## Sheet: VFDB.anno_result
Supplementary Table 7.Prediction results of virulence factors in the GSXT20191014 genome.
#gene_ID	VFDB_gene_name	VFDB_gene_function	Virulence_factor_name	Virulence_factor_id	VFDB_target_id	E-value	Percent-identity	Query-cover	score
GE000005	hsiA1	type VI secretion system hcp secretion island protein HsiA1	HSI-I	VF0334	VFG002068(gb|NP_248772)	3.48e-12	39.87	61.85	62
GE000007	cap8J	capsular polysaccharide synthesis enzyme Cap8J	Capsule	VF0003	VFG001306(gb|NP_644948)	3.59e-14	37.25	51.3	64
GE000011	plcD	phosphatidylserine/phosphatidylglycerophosphate/cardiolipin synthase	Phospholipase D	VF0469	VFG037203(gb|YP_001847849)	3.3e-18	22.51	71.94	84
GE000019	mtrD	multiple transferable resistance system protein MtrD	MtrCDE	VF0451	VFG036992(gb|NP_274718)	4.93e-54	23.98	97.94	202
GE000027	clbA	colibactin biosynthesis phosphopantetheinyl transferase ClbA	Colibactin	VF0573	VFG049147(gb|YP_006635473.1)	3.48e-14	39.77	42.16	65
GE000039	prsA2	post translocation chaperone PrsA2	PrsA2	VF0449	VFG032878(gb|NP_465743)	1.33e-09	31.78	35.03	55
GE000044	pvdD	pyoverdine synthetase D	Pyoverdine	VF0094	VFG000161(gb|NP_251089)	3.51e-27	27.03	78.36	115
GE000045	rcsB	transcriptional regulator RcsB	RcsAB	VF0571	VFG049018(gb|YP_002920501.1)	3.2e-15	25.89	86.94	68
GE000052	cylG	3-ketoacyl-ACP-reductase CylG	Beta-hemolysin/cytolysin	CVF171	VFG005767(gb|NP_687682)	9.02e-30	31.17	93.75	111
GE000056	gluP	glucose/galactose transporter	LPS	VF0056	VFG000313(gb|NP_207965)	4.54e-59	36.79	92.36	198
GE000057	allR	DNA-binding transcriptional repressor AllR	Allantion utilization	VF0572	VFG049118(gb|YP_002918201.1)	3.43e-08	24.75	78.31	50
GE000058	pchR	transcriptional regulator PchR	Pyochelin	VF0095	VFG000167(gb|NP_252917)	1.16e-06	34.44	22.11	46
GE000061	fleS/flrB	two-component sensor kinase	ND	AI144	VFG038759(gb|YP_857329)	2.01e-19	27.01	26.77	88
GE000063	cgs	cyclic beta 1-2 glucan synthetase	C<beta>G	VF0366	VFG002219(gb|NP_540754)	3.29e-54	26.16	90.56	201
GE000074	tapB	type IV pilus assembly ATPase, PilB-like	Tap type IV pili	CVF783	VFG038431(gb|YP_858308)	######	38.84	82.59	366
GE000089	bopD	sugar-binding transcriptional regulator, LacI family	BopD	VF0362	VFG002197(gb|NP_814691)	4.63e-25	26.24	89.49	101
GE000101	CBU_1789	Coxiella Dot/Icm type IVB secretion system translocated effector	T4SS effectors	CVF803	VFG039623(gb|NP_820769)	6.65e-08	27.94	37.68	50
GE000107	phtA	major facilitator family transporter, phagosomal transporter	Pht	VF0337	VFG002097(gb|YP_094583)	7.21e-09	21.5	41.78	54
GE000119	bopD	sugar-binding transcriptional regulator, LacI family	BopD	VF0362	VFG002197(gb|NP_814691)	9.78e-26	25.48	85.43	102
GE000147	fptA	Fe(III)-pyochelin receptor precursor	Pyochelin	VF0095	VFG000164(gb|NP_252911)	1.24e-34	23.74	89.93	137
GE000154	farA	fatty acid efflux system protein FarA	FarAB	VF0450	VFG036938(gb|NP_273367)	1.35e-25	30.24	76.87	102
GE000155	adeH	outer membrane protein	AdeFGH efflux pump	VF0504	VFG037735(gb|YP_001847165)	4.75e-39	30.4	93.58	145
GE000159	ptxR	transcriptional regulator PtxR	pyoverdine	IA001	VFG044083(gb|NP_250948)	6.44e-33	32.2	98	122
GE000160	cylG	3-ketoacyl-ACP-reductase CylG	Beta-hemolysin/cytolysin	CVF171	VFG005767(gb|NP_687682)	1.52e-16	27.27	66.31	73
GE000161	plcD	phosphatidylserine/phosphatidylglycerophosphate/cardiolipin synthase	Phospholipase D	VF0469	VFG037203(gb|YP_001847849)	5.94e-19	22.01	79.33	85
GE000191	vipF	Dot/Icm type IV secretion system effector VipF	Dot/Icm	VF0156	VFG002112(gb|YP_094157)	1.14e-06	32.53	42.63	44
GE000193	hitC) iron(III	ABC transporter, ATP-binding protein	HitABC	VF0268	VFG000344(gb|NP_438273)	3.64e-28	32.05	87.88	108
GE000202	clbB	colibactin hybrid non-ribosomal peptide synthetase/type I polyketide synthase ClbB	Colibactin	VF0573	VFG049148(gb|YP_006635474.1)	1.79e-14	32.81	54.33	71
GE000203	ptxR	transcriptional regulator PtxR	pyoverdine	IA001	VFG044083(gb|NP_250948)	3.32e-15	30.6	86.6	71
GE000208	iroN	salmochelin receptor IroN	IroN	VF0230	VFG000935(gb|NP_753164)	2.44e-08	27.32	19.98	54
GE000214	pvdM	dipeptidase precursor	pyoverdine	IA001	VFG015983(gb|NP_251083)	5.64e-38	28.92	90.58	141
GE000225	pdgA	Peptidoglycan N-deacetylase	PgdA	VF0442	VFG033025(gb|NP_463944)	5.79e-21	33.51	20.67	93
GE000236	pspA	pneumococcal surface protein A	PspA	VF0152	VFG001361(gb|NP_344663)	5.94e-06	35	26.46	43
GE000240	pdxJ	pyridoxine 5'-phosphate synthase	Pse5Ac7Ac	AI150	VFG043390(gb|NP_208373)	1.02e-22	27.1	91.41	91
GE000242	plcD	phosphatidylserine/phosphatidylglycerophosphate/cardiolipin synthase	Phospholipase D	VF0469	VFG037203(gb|YP_001847849)	1.81e-23	23.91	78.19	100
GE000268	ptxR	transcriptional regulator PtxR	pyoverdine	IA001	VFG044083(gb|NP_250948)	1.17e-33	34.12	98.32	124
GE000271	ptxR	transcriptional regulator PtxR	pyoverdine	IA001	VFG044083(gb|NP_250948)	2.55e-24	30.14	93.58	97
GE000283	coxFIC1	Coxiella Dot/Icm type IVB secretion system translocated effector	Dot/Icm	SS051	VFG039696(gb|NP_821048)	1.18e-29	33.33	57.85	115
GE000284	AHA_3493	hemolysin III	Hemolysin III	CVF793	VFG038904(gb|YP_857967)	1.02e-22	41.54	58.64	90
GE000301	csgD	DNA-binding transcriptional regulator CsgD	curli fibers/thin aggregative fimbriae (AGF)	AI094	VFG004125(gb|NP_460113)	8.97e-11	42.37	77.33	52
GE000306	aur	zinc metalloproteinase aureolysin	Aureolysin	VF0024	VFG001314(gb|NP_647375)	3.56e-53	42.46	69.49	182
GE000307	chuY	ChuY	Chu	VF0227	VFG000921(gb|NP_756178)	1.83e-08	28.36	90.37	49
GE000310	lipF	Probable esterase/lipase LipF	LipF	VF0307	VFG001415(gb|NP_218004)	5.24e-14	28.17	64.15	68
GE000321	AHA_1389	CobQ/CobB/MinD/ParA family protein	Polar flagella	CVF786	VFG038722(gb|YP_855928)	4.64e-07	26.14	50.94	46
GE000326	virB1	type IV secretion system attachment mediating protein VirB1 Homolog	VirB type IV secretion system	VF0365	VFG002208(gb|NP_541002)	2.24e-16	33.54	75	72
GE000328	virD4	type IV secretion system component VirD4	Rvh T4SS	VF0487	VFG039025(gb|YP_505894)	2.32e-70	34.76	68.91	243
GE000360	chuA	Outer membrane heme/hemoglobin receptor ChuA	Chu	VF0227	VFG000917(gb|NP_756170)	2.84e-06	27.33	20.62	47
GE000374	bprB	two-component response regulator	Bsa T3SS	VF0428	VFG002440(gb|YP_111528)	8.96e-17	33.5	90.95	73
GE000379	vtrA	type III secretion system transcriptional regulator	T3SS2	VF0409	VFG041911(gb|NP_800842)	1.52e-07	32.47	7.01	50
GE000380	CBU_0270	Coxiella Dot/Icm type IVB secretion system translocated effector, trans-2-enoyl-CoA reductase	T4SS effectors	CVF803	VFG039282(gb|NP_819314)	######	54.59	97.01	437
GE000384	iroN	salmochelin receptor IroN	IroN	VF0230	VFG000935(gb|NP_753164)	1.1e-07	30.22	14.21	52
GE000414	bopD	sugar-binding transcriptional regulator, LacI family	BopD	VF0362	VFG002197(gb|NP_814691)	4.41e-26	27.14	93.18	103
GE000416	cylG	3-ketoacyl-ACP-reductase CylG	Beta-hemolysin/cytolysin	CVF171	VFG005767(gb|NP_687682)	7.67e-36	31.56	95.22	127
GE000423	fpvA	ferripyoverdine receptor FpvA	Pyoverdine	VF0094	VFG000163(gb|NP_251088)	######	36.54	97.7	430
GE000424	vpdC	Dot/Icm type IV secretion system effector VpdC	Dot/Icm	SS047	VFG041278(gb|YP_095455)	6.38e-09	22.33	50.43	54
GE000428	chuV	ATP-binding hydrophilic protein ChuV	Chu	VF0227	VFG044172(gb|NP_756180)	1.75e-22	29.61	80.94	91
GE000431	fbpC) iron(III	ABC transporter, ATP-binding protein	FbpABC	VF0272	VFG001206(gb|NP_273675)	3.22e-45	39.91	91.43	154
GE000441	AHA_1389	CobQ/CobB/MinD/ParA family protein	Polar flagella	CVF786	VFG038722(gb|YP_855928)	7.34e-07	50	20.48	45
GE000444	plcD	phosphatidylserine/phosphatidylglycerophosphate/cardiolipin synthase	Phospholipase D	VF0469	VFG037203(gb|YP_001847849)	1.07e-39	27.23	72.12	150
GE000448	tapF	type IV pilus biogenesis/stability protein, pilW-like	Tap type IV pili	CVF783	VFG038504(gb|YP_856293)	8.29e-09	27.33	24.35	54
GE000455	fleS/flrB	two-component sensor kinase	ND	AI144	VFG038759(gb|YP_857329)	3.86e-18	31.1	93.45	81
GE000456	pilR	two-component response regulator PilR	Type IV pili	VF0082	VFG001214(gb|NP_253237)	6.52e-96	39.78	96.64	297
GE000458	sodCI	Gifsy-2 prophage: superoxide dismutase precursor (Cu-Zn)	SodCI	VF0109	VFG000463(gb|NP_460019)	6.93e-15	30.15	94	67
GE000459	sodC	superoxide dismutase (copper-zinc)	SodC	VF0170	VFG001868(gb|YP_096357)	1.39e-13	35.61	60.47	63
GE000467	lpsA	glycosyltransferase	LOS	CVF494	VFG013342(gb|NP_438924)	9.84e-14	25.11	80.67	66
GE000481	coxFIC1	Coxiella Dot/Icm type IVB secretion system translocated effector	Dot/Icm	SS051	VFG039696(gb|NP_821048)	9.69e-22	28.4	79.84	92
GE000486	clbK	colibactin hybrid non-ribosomal peptide synthetase/type I polyketide synthase ClbK	Colibactin	VF0573	VFG049157(gb|YP_006635483.1)	7.86e-21	25.21	80.4	93
GE000487	pseB	UDP-GlcNAc-specific C4,6 dehydratase/C5 epimerase	Pse5Ac7Ac, Pse5Ac7Am, Pse8OAc, Pse5Am7AcGlnAc	AI151	VFG012002(gb|NP_282439)	1.7e-09	28.05	45.24	55
GE000501	icaR	ica operon transcriptional regulator IcaR	Intercellular adhesion proteins	VF0014	VFG001284(gb|NP_647402)	1.26e-06	27.27	25.71	44
GE000503	bsaN	AraC family transcriptional regulator, regulates basal T6SS1 expression	Bsa T3SS	VF0428	VFG002464(gb|YP_111552)	1.07e-09	32.08	39	53
GE000504	allS	DNA-binding transcriptional activator AllS	Allantion utilization	VF0572	VFG049114(gb|YP_002918199.1)	1.5e-13	25.98	85.22	67
GE000506	icl) Isocitrate lyase Icl (isocitrase	(isocitratase)	Isocitrate lyase	VF0253	VFG001381(gb|YP_177728)	0	67.92	98.61	603
GE000507	cdpA	cyclic di-GMP phosphodiesterase	CdpA	VF0432	VFG045467(gb|YP_107884)	1.85e-08	28.7	56.77	52
GE000510	llsB	SagB family dehydrogenase LlsB	LLS	VF0410	VFG045335(gb|AHK25020)	8.78e-08	20.79	49.5	50
GE000514	clbF	colibactin biosynthesis dehydrogenase ClbF	Colibactin	VF0573	VFG049152(gb|YP_006635478.1)	7.97e-42	31.94	84.24	149
GE000528	coxH3	Coxiella Dot/Icm type IVB secretion system translocated effector	Dot/Icm	SS051	VFG039615(gb|NP_820749)	6.91e-53	44.67	88.64	169
GE000534	mbtJ	Putative acetyl hydrolase MbtJ	mycobactin	IA031	VFG009553(gb|YP_177876)	2e-13	30.37	79.24	65
GE000539	clbB	colibactin hybrid non-ribosomal peptide synthetase/type I polyketide synthase ClbB	Colibactin	VF0573	VFG049148(gb|YP_006635474.1)	5.69e-09	31.54	42.4	54
GE000545	cheD	methyl-accepting chemotaxis protein CheD	peritrichous flagella	AI145	VFG043209(gb|YP_001006778)	1.29e-84	55.52	43.26	278
GE000553	allC	allantoate amidohydrolase	Allantion utilization	VF0572	VFG049122(gb|YP_002918211.1)	8.54e-59	33.16	91.25	197
GE000554	ptxR	transcriptional regulator PtxR	pyoverdine	IA001	VFG044083(gb|NP_250948)	9.66e-36	32.31	98.32	130
GE000558	plcD	phosphatidylserine/phosphatidylglycerophosphate/cardiolipin synthase	Phospholipase D	VF0469	VFG037203(gb|YP_001847849)	2.28e-08	26.95	39.23	52
GE000559	dep/capD	gamma-glutamyltranspeptidase, required for polyglutamate anchoring to peptidoglycan	Capsule	VF0141	VFG000679(gb|AAF13660)	4.5e-30	25.88	94.3	119
GE000560	clbL	colibactin biosynthesis amidase ClbL	Colibactin	VF0573	VFG049158(gb|YP_006635484.1)	3.21e-25	28.19	84.36	105
GE000566	allS	DNA-binding transcriptional activator AllS	Allantion utilization	VF0572	VFG049114(gb|YP_002918199.1)	7.78e-09	24.12	80.98	52
GE000569	ptxR	transcriptional regulator PtxR	pyoverdine	IA001	VFG044083(gb|NP_250948)	1.21e-09	31.35	59.28	55
GE000573	fepA	outer membrane receptor FepA	Ent	VF0562	VFG048518(gb|YP_002918367.1)	3.19e-06	27.92	33.21	46
GE000581	ptxR	transcriptional regulator PtxR	pyoverdine	IA001	VFG044083(gb|NP_250948)	2.36e-13	27.91	95.02	66
GE000591	cheD	methyl-accepting chemotaxis protein CheD	peritrichous flagella	AI145	VFG043209(gb|YP_001006778)	5.99e-45	40.8	35.42	166
GE000602	ricA	Rab2 interacting conserved protein A	RicA	VF0414	VFG045340(gb|NP_539653)	1.35e-38	40.57	95.03	130
GE000608	cylG	3-ketoacyl-ACP-reductase CylG	Beta-hemolysin/cytolysin	CVF171	VFG005767(gb|NP_687682)	1.15e-11	24.91	95.69	60
GE000610	exsA	type III secretion system regulatory protein ExsA	TTSS	VF0083	VFG000208(gb|NP_250404)	3.26e-09	22.27	80.2	53
GE000628	allR	DNA-binding transcriptional repressor AllR	Allantion utilization	VF0572	VFG049118(gb|YP_002918201.1)	2.84e-14	24.69	83.57	68
GE000631	lipF	Probable esterase/lipase LipF	LipF	VF0307	VFG001415(gb|NP_218004)	2.77e-09	29.44	68.01	54
GE000636	lpg2628	Dot/Icm type IV secretion system effector	Dot/Icm	VF0156	VFG045590(gb|YP_096633)	1.33e-06	30.28	52.68	44
GE000640	cylG	3-ketoacyl-ACP-reductase CylG	Beta-hemolysin/cytolysin	CVF171	VFG005767(gb|NP_687682)	1.88e-24	26.46	94.62	96
GE000644	wcbT	acyl-CoA transferase	Capsule I	VF0436	VFG002546(gb|YP_109382)	5.47e-37	30.5	92.77	137
GE000650	fyuA	yersiniabactin receptor FyuA	Ybt	VF0564	VFG044333(gb|YP_002920253)	1.15e-12	26.67	39.38	68
GE000651	sodB	superoxide dismutase	SodB	VF0169	VFG001867(gb|YP_096960)	8.01e-49	41.97	82.05	159
GE000652	fepA	ferrienterobactin outer membrane transporter	Enterobactin	VF0228	VFG000923(gb|NP_752600)	3.46e-12	23.79	77.45	66
GE000656	pvdN	pyoverdine biosynthesis protein PvdN	pyoverdine	IA001	VFG015994(gb|NP_251084)	2.53e-13	23.67	98.84	68
GE000661	wcbQ	capsular polysaccharide biosynthesis transmembrane protein	Capsule I	VF0436	VFG002549(gb|YP_109385)	7.4e-07	28.57	21.37	48
GE000666	rfpB	putative galactosyltransferase	O-antigen	VF0392	VFG002366(gb|YP_001007258)	4.48e-08	30.6	23.86	51
GE000674	flmH	short chain dehydrogenase/reductase family oxidoreductase	Polar flagella	CVF786	VFG038839(gb|YP_858598)	3.14e-34	36.14	96.43	123
GE000677	adeH	outer membrane protein	AdeFGH efflux pump	VF0504	VFG037735(gb|YP_001847165)	3.78e-42	31.16	93.88	155
GE000678	icaR	ica operon transcriptional regulator IcaR	Intercellular adhesion proteins	VF0014	VFG001284(gb|NP_647402)	2.12e-06	26.37	43	43
GE000679	adeF	membrane-fusion protein	AdeFGH efflux pump	VF0504	VFG037705(gb|YP_001847163)	2.91e-07	25.55	81.94	48
GE000680	acrB	acriflavine resistance protein B	AcrAB	VF0568	VFG049144(gb|YP_002918165.1)	3.5e-50	23.63	96.21	190
GE000690	iraB	Di/tripeptide permease	IraAB	VF0293	VFG001857(gb|YP_094782)	3.04e-37	26.03	92.49	140
GE000717	mbtI	Isochorismate synthase MbtI	mycobactin	IA031	VFG009561(gb|YP_177877)	1.57e-31	29.86	69.04	123
GE000725	phzE1	phenazine biosynthesis protein PhzE	Phenazines biosynthesis	CVF536	VFG015515(gb|NP_252903)	3.49e-12	27.84	98.41	61
GE000739	bfmS	signal transduction histidine kinase	BfmRS	VF0463	VFG038234(gb|YP_001845365)	1.71e-20	31.53	31.82	92
GE000740	bfmR	biofilm-controlling response regulator	BfmRS	VF0463	VFG038219(gb|YP_001845364)	4.47e-13	30.08	20.31	66
GE000750	allS	DNA-binding transcriptional activator AllS	Allantion utilization	VF0572	VFG049114(gb|YP_002918199.1)	2.82e-09	24.71	82	54
GE000763	cpsB	phosphatidate cytidylyltransferase	Capsule	VF0361	VFG002189(gb|NP_816140)	7.48e-23	38.93	38.27	93
GE000764	vgrG1b	type VI secretion system substrate VgrG1b	HSI-1 (Hcp-secretion island 1)	SS178	VFG041011(gb|NP_248785)	3.11e-11	21.43	25.73	64
GE000780	htpB	Hsp60, 60K heat shock protein HtpB	Hsp60	VF0159	VFG001855(gb|YP_094724)	0	73.81	96.34	766
GE000787	fepA	outer membrane receptor FepA	Ent	VF0562	VFG048518(gb|YP_002918367.1)	1.04e-10	31.52	18.37	62
GE000796	CBU_1789	Coxiella Dot/Icm type IVB secretion system translocated effector	T4SS effectors	CVF803	VFG039623(gb|NP_820769)	4.77e-07	27.54	42.81	47
GE000800	fpvA	ferripyoverdine receptor FpvA	Pyoverdine	VF0094	VFG000163(gb|NP_251088)	######	32.47	98.34	395
GE000812	bauF	siderophore-interacting protein	Acinetobactin	VF0467	VFG037456(gb|YP_001847248)	5.44e-19	30.51	65.65	81
GE000821	clbI	colibactin polyketide synthase ClbI	Colibactin	VF0573	VFG049155(gb|YP_006635481.1)	2.39e-18	27.22	97.06	82
GE000858	iroE	esterase	Salmochelin	IA013	VFG012501(gb|NP_753165)	1.13e-08	31.62	39.57	52
GE000891	cdpA	cyclic di-GMP phosphodiesterase	CdpA	VF0432	VFG045467(gb|YP_107884)	4.8e-07	27.4	30.75	50
GE000892	tsr	methyl-accepting chemotaxis protein I	Flagella	VF0430	VFG002529(gb|YP_109900)	5.47e-93	61.19	39.92	303
GE000896	fpvA	ferripyoverdine receptor FpvA	Pyoverdine	VF0094	VFG000163(gb|NP_251088)	######	38.62	96.77	469
GE000901	algZ	sigma factor AlgU	Alginate	VF0091	VFG000120(gb|NP_253949)	2.27e-56	40.13	85.19	187
GE000902	algR	alginate biosynthesis regulatory protein AlgR	Alginate	VF0091	VFG000119(gb|NP_253948)	2.23e-64	47.79	97.56	201
GE000916	fimE	tyrosine recombinase	Type I fimbriae	VF0566	VFG048237(gb|YP_002921135.1)	2.06e-18	30.56	54.04	79
GE000925	farA	fatty acid efflux system protein FarA	FarAB	VF0450	VFG036938(gb|NP_273367)	2.17e-34	35.67	84.3	129
GE000933	ankA	Anaplasma T4SS effector protein, ankyrin repeat domain-containing protein A	T4SS	SS052	VFG039063(gb|YP_505319)	9.52e-08	31.25	37.78	51
GE000937	fptA	Fe(III)-pyochelin receptor precursor	Pyochelin	VF0095	VFG000164(gb|NP_252911)	2.26e-07	25.85	24.43	51
GE000940	fleQ	transcriptional regulator FleQ	polar flagella	AI149	VFG043319(gb|YP_094888)	1.77e-63	39.42	44.75	217
GE000947	virD4	type IV secretion system component VirD4	Rvh T4SS	VF0487	VFG039025(gb|YP_505894)	9.25e-80	32.88	87.99	265
GE000966	allS	DNA-binding transcriptional activator AllS	Allantion utilization	VF0572	VFG049114(gb|YP_002918199.1)	2.76e-11	26.73	95.35	60
GE000975	gnd	6-phosphogluconate dehydrogenase	Capsule	VF0560	VFG048830(gb|YP_002920353.1)	1.1e-44	35.15	88.5	157
GE000976	bplA	probable oxidoreductase	LPS	VF0033	VFG000038(gb|NP_878995)	7.75e-12	25.68	61.08	62
GE000978	fleS/flrB	two-component sensor kinase	ND	AI144	VFG038759(gb|YP_857329)	1.28e-12	24.38	58.71	66
GE000979	chpA	still frameshift probable component of chemotactic signal transduction system	Type IV pili	VF0082	VFG001231(gb|NP_249104)	1.01e-14	39.02	55.48	68
GE000980	fleS/flrB	two-component sensor kinase	ND	AI144	VFG038759(gb|YP_857329)	7.63e-22	30.3	45.4	93
GE000982	flmH	short chain dehydrogenase/reductase family oxidoreductase	Polar flagella	CVF786	VFG038839(gb|YP_858598)	5.43e-27	36.59	95.92	103
GE000988	gspC	general secretion pathway protein C	T2SS	VF0333	VFG002046(gb|YP_404599)	1.96e-11	29.27	71.22	60
GE000989	gspD	general secretion pathway protein D	T2SS	VF0333	VFG002047(gb|YP_404600)	6.05e-89	33.23	91.01	290
GE000990	xcpR	general secretion pathway protein E	xcp secretion system	VF0084	VFG000182(gb|NP_251793)	######	54.41	96.19	495
GE000991	exeF	general secretion pathway protein F	exe	SS209	VFG038280(gb|YP_855104)	1.82e-91	40.45	98.99	282
GE000992	gspG	general secretion pathway protein G	T2SS	VF0333	VFG002050(gb|YP_404603)	2.08e-52	50.68	94.16	164
GE000994	xcpV	general secretion pathway protein I	xcp secretion system	VF0084	VFG000178(gb|NP_251789)	2.71e-12	33.94	81.68	57
GE000995	exeJ	general secretion pathway protein J	exe	SS209	VFG038296(gb|YP_855108)	6.01e-26	33.17	98.49	98
GE000996	exeK	general secretion pathway protein K	exe	SS209	VFG038300(gb|YP_855109)	3.79e-40	32.23	97.27	143
GE000997	exeL	general secretion pathway protein L	exe	SS209	VFG038304(gb|YP_855110)	1.7e-09	34.82	31.36	55
GE001001	gluP	glucose/galactose transporter	LPS	VF0056	VFG000313(gb|NP_207965)	6.2e-36	29.98	93.65	134
GE001002	bopD	sugar-binding transcriptional regulator, LacI family	BopD	VF0362	VFG002197(gb|NP_814691)	4.66e-25	28.8	83.01	100
GE001009	fepA	ferrienterobactin outer membrane transporter	Enterobactin	VF0228	VFG000923(gb|NP_752600)	1.14e-09	29.26	18.35	58
GE001017	pvcD	paerucumarin biosynthesis protein PvcD	pyoverdine	IA001	VFG044082(gb|NP_250947)	3.21e-20	33.87	68.68	83
GE001020	bfmS	signal transduction histidine kinase	BfmRS	VF0463	VFG038234(gb|YP_001845365)	2.11e-22	28	51	97
GE001021	bfmR	biofilm-controlling response regulator	BfmRS	VF0463	VFG038219(gb|YP_001845364)	1.53e-43	38.43	92.64	147
GE001031	phzF1	phenazine biosynthesis protein PhzF, isomerase	Phenazines biosynthesis	CVF536	VFG015518(gb|NP_252904)	3.94e-13	32.88	80.61	64
GE001045	CBU_1079	Coxiella Dot/Icm type IVB secretion system translocated effector	T4SS effectors	CVF803	VFG039430(gb|NP_820078)	1e-29	34.38	91.94	108
GE001048	pdgA	Peptidoglycan N-deacetylase	PgdA	VF0442	VFG033025(gb|NP_463944)	1.36e-18	27.85	82.17	82
GE001051	Cj1436c	aminotransferase	Capsule	VF0323	VFG001964(gb|NP_282577)	3.12e-12	25.88	39.01	64
GE001057	fepA	outer membrane receptor FepA	Ent	VF0562	VFG048518(gb|YP_002918367.1)	1.14e-08	28.79	22.13	55
GE001059	bopD	sugar-binding transcriptional regulator, LacI family	BopD	VF0362	VFG002197(gb|NP_814691)	7.19e-29	26.49	95.34	112
GE001060	cylG	3-ketoacyl-ACP-reductase CylG	Beta-hemolysin/cytolysin	CVF171	VFG005767(gb|NP_687682)	1.06e-45	35.54	97.56	153
GE001064	phoP	Possible two component system response transcriptional positive regulator PhoP	PhoP	VF0286	VFG001386(gb|NP_215271)	1.07e-31	33.48	93.56	115
GE001065	phoR	Possible two component system response sensor kinase membrane associated PhoR	PhoP/R	CVF331	VFG009810(gb|NP_215272)	4.08e-27	30.88	84.38	110
GE001067	bprB	two-component response regulator	Bsa T3SS	VF0428	VFG002440(gb|YP_111528)	2.11e-16	29.84	87.26	72
GE001070	bfmS	signal transduction histidine kinase	BfmRS	VF0463	VFG038234(gb|YP_001845365)	5.3e-19	29.19	23.38	88
GE001078	htrB	lipid A biosynthesis lauroyl acyltransferase	LOS	CVF494	VFG013436(gb|NP_439676)	3.35e-56	34.11	95.42	184
GE001079	waaA	lipopolysaccharide core biosynthesis protein WaaP	LPS	VF0085	VFG000141(gb|NP_253675)	######	47.92	92.48	343
GE001080	mtrE	multidrug efflux pump channel protein MtrE	MtrCDE	VF0451	VFG037010(gb|NP_274717)	2.32e-13	24.93	70.9	68
GE001082	icaR	ica operon transcriptional regulator IcaR	Intercellular adhesion proteins	VF0014	VFG001284(gb|NP_647402)	1.96e-06	30.19	23.96	43
GE001084	allS	DNA-binding transcriptional activator AllS	Allantion utilization	VF0572	VFG049114(gb|YP_002918199.1)	3.59e-14	31.32	58.67	68
GE001094	dep/capD	gamma-glutamyltranspeptidase, required for polyglutamate anchoring to peptidoglycan	Capsule	VF0141	VFG000679(gb|AAF13660)	4.03e-42	28.02	89.46	155
GE001095	cheD	methyl-accepting chemotaxis protein CheD	peritrichous flagella	AI145	VFG043209(gb|YP_001006778)	3.75e-23	31.51	35.46	100
GE001099	vtrA	type III secretion system transcriptional regulator	T3SS2	VF0409	VFG041911(gb|NP_800842)	3.84e-10	38.96	9.82	58
GE001100	exsA	Type III secretion system transcriptional regulator	T3SS	VF0479	VFG038332(gb|YP_001144282)	4.51e-06	27.27	33	44
GE001101	fepA	outer membrane receptor FepA	Ent	VF0562	VFG048518(gb|YP_002918367.1)	4.11e-08	26.06	18.19	53
GE001119	cylG	3-ketoacyl-ACP-reductase CylG	Beta-hemolysin/cytolysin	CVF171	VFG005767(gb|NP_687682)	2.12e-08	26	73.43	50
GE001122	pvdH	diaminobutyrate-2-oxoglutarate aminotransferase PvdH	pyoverdine	IA001	VFG016046(gb|NP_251103)	6.4e-36	31.05	89.29	135
GE001124	fpvA	ferripyoverdine receptor FpvA	Pyoverdine	VF0094	VFG000163(gb|NP_251088)	7.17e-08	34.56	16.78	52
GE001128	Cj1437c	aminotransferase	Capsule	VF0323	VFG001965(gb|NP_282578)	9.6e-22	23.86	69.42	92
GE001130	csgD	DNA-binding transcriptional regulator CsgD	curli fibers/thin aggregative fimbriae (AGF)	AI094	VFG004125(gb|NP_460113)	6.39e-09	46.43	5.97	54
GE001131	pvdH	diaminobutyrate-2-oxoglutarate aminotransferase PvdH	pyoverdine	IA001	VFG016046(gb|NP_251103)	3.64e-30	29.25	83.68	118
GE001149	chuW	Putative oxygen independent coproporphyrinogen III oxidase	Chu	VF0227	VFG000919(gb|NP_756176)	2.88e-26	28.57	72.73	106
GE001150	orfM	deoxyribonucleotide triphosphate pyrophosphatase	LOS	CVF494	VFG013265(gb|NP_438428)	4.73e-71	52.85	96.48	215
GE001156	relA) Probable GTP pyrophosphokinase RelA (ATP:GTP 3'-pyrophosphotransferase) (PPGPP synthetase I) ((P)PPGPP synthetase	(GTP diphosphokinase)	RelA	VF0287	VFG001826(gb|NP_217099)	######	39.36	94.88	504
GE001157	allS	DNA-binding transcriptional activator AllS	Allantion utilization	VF0572	VFG049114(gb|YP_002918199.1)	3.33e-15	26.19	98.96	71
GE001160	phtA	major facilitator family transporter, phagosomal transporter	Pht	VF0337	VFG002097(gb|YP_094583)	1.17e-11	22.34	80.79	63
GE001171	pilM	type IV pilus inner membrane platform protein PilM	Type IV pili	VF0082	VFG001222(gb|NP_253731)	######	61.19	99.72	407
GE001172	pilN	type IV pilus inner membrane platform protein PilN	Type IV pili	VF0082	VFG001221(gb|NP_253730)	9.18e-41	40	77.61	139
GE001173	pilO	type IV pilus inner membrane platform protein PilO	Type IV pili	VF0082	VFG001220(gb|NP_253729)	1.53e-47	41	90.05	155
GE001174	pilP	type IV pilus biogenesis protein PilP	Type IV pili	VF0082	VFG001219(gb|NP_253728)	3.12e-38	43.42	82.49	129
GE001175	tapQ	type IV pilus secretin PilQ	Tap type IV pili	CVF783	VFG038459(gb|YP_857681)	######	38.1	95.83	386
GE001185	fpvA	ferripyoverdine receptor FpvA	Pyoverdine	VF0094	VFG000163(gb|NP_251088)	######	36.82	95.08	433
GE001186	ptxR	transcriptional regulator PtxR	pyoverdine	IA001	VFG044083(gb|NP_250948)	5.36e-23	30.9	94.06	93
GE001187	cylG	3-ketoacyl-ACP-reductase CylG	Beta-hemolysin/cytolysin	CVF171	VFG005767(gb|NP_687682)	1.48e-21	24	97.23	88
GE001197	hitC) iron(III	ABC transporter, ATP-binding protein	HitABC	VF0268	VFG000344(gb|NP_438273)	2.12e-37	36.59	98.04	132
GE001198	fbpB) iron(III	ABC transporter, permease protein	FbpABC	VF0272	VFG000249(gb|NP_273676)	5.32e-09	24.76	89.57	52
GE001225	bfmS	signal transduction histidine kinase	BfmRS	VF0463	VFG038234(gb|YP_001845365)	9.47e-15	29.41	52.01	72
GE001227	iroN	salmochelin receptor IroN	Sal	VF0563	VFG044334(gb|YP_002920266)	2.2e-06	24.35	25.78	47
GE001233	cysC	adenylylsulfate kinase	Capsule	VF0323	VFG001988(gb|NP_282556)	1.02e-17	28.82	25.53	79
GE001234	adeF	membrane-fusion protein	AdeFGH efflux pump	VF0504	VFG037705(gb|YP_001847163)	1.72e-21	28.8	80.06	91
GE001235	mtrD	multiple transferable resistance system protein MtrD	MtrCDE	VF0451	VFG036992(gb|NP_274718)	######	33.4	97.5	531
GE001245	iroN	salmochelin receptor IroN	IroN	VF0230	VFG000935(gb|NP_753164)	7.49e-06	27.93	16.46	46
GE001247	bopD	sugar-binding transcriptional regulator, LacI family	BopD	VF0362	VFG002197(gb|NP_814691)	7.4e-27	28.86	96.28	106
GE001258	tlh	thermolabile hemolysin TLH	thermolabile hemolysin (TLH)/lecithin-dependent hemolysin (LDH)	TX170	VFG007035(gb|NP_799736)	7.19e-13	24.67	46.45	67
GE001264	allS	DNA-binding transcriptional activator AllS	Allantion utilization	VF0572	VFG049114(gb|YP_002918199.1)	2.92e-16	29.48	57.48	74
GE001274	virB6	type IV secretion system channel protein VirB6	VirB type IV secretion system	VF0365	VFG002213(gb|NP_541007)	6.27e-08	21.52	59.89	50
GE001288	phoP	Possible two component system response transcriptional positive regulator PhoP	PhoP	VF0286	VFG001386(gb|NP_215271)	5.83e-32	34.36	98.22	116
GE001289	phoR	Possible two component system response sensor kinase membrane associated PhoR	PhoP/R	CVF331	VFG009810(gb|NP_215272)	9.07e-21	28.48	93.47	91
GE001294	xcpA/pilD	type 4 prepilin peptidase PilD	Type IV pili	VF0082	VFG000114(gb|NP_253218)	2.16e-74	51.05	98.95	230
GE001295	pilC	type IV pilus assembly protein PilC	Type IV pili	VF0155	VFG001881(gb|YP_095552)	2.07e-36	61.05	96.91	126
GE001296	pilE	Type IV pilus major pilin subunit PilE	Type IV pili	VF0075	VFG000221(gb|NP_273084)	1.26e-44	46.95	95.89	144
GE001297	tapB	type IV pilus assembly ATPase, PilB-like	Tap type IV pili	CVF783	VFG038431(gb|YP_858308)	0	56.56	99.8	603
GE001298	pilR	two-component response regulator PilR	Type IV pili	VF0082	VFG001214(gb|NP_253237)	0	63.26	98.92	551
GE001299	pilS	two-component sensor PilS	Type IV pili	VF0082	VFG001213(gb|NP_253236)	######	37.74	96.46	313
GE001311	cheD	methyl-accepting chemotaxis protein CheD	peritrichous flagella	AI145	VFG043209(gb|YP_001006778)	1.03e-88	56.49	49.36	286
GE001316	iroN	salmochelin receptor IroN	IroN	VF0230	VFG000935(gb|NP_753164)	2.33e-16	23.43	70.78	80
GE001325	clpC	endopeptidase Clp ATP-binding chain C	ClpC	VF0072	VFG000079(gb|NP_463763)	0	45.55	99.77	712
GE001328	iroN	salmochelin receptor IroN	Sal	VF0563	VFG044334(gb|YP_002920266)	1.91e-24	23.77	97.44	105
GE001344	iucA	aerobactin Synthetase IucA	Aerobactin	VF0565	VFG048600(gb|YP_001688094.1)	6.97e-29	28.61	63.84	118
GE001345	lbtB	LbtB inner membrane protein required for export of Legiobactin	Legiobactin	VF0291	VFG010858(gb|YP_095354)	2.11e-13	28.99	57.91	68
GE001346	lbtA	siderophore biosynthetic enzyme LbtA	Legiobactin	VF0291	VFG010854(gb|YP_095355)	8.73e-27	27.78	60.83	112
GE001348	fyuA	yersiniabactin receptor FyuA	Ybt	VF0564	VFG044333(gb|YP_002920253)	1.12e-07	26.33	39.77	51
GE001352	fepA	outer membrane receptor FepA	Ent	VF0562	VFG048518(gb|YP_002918367.1)	2.67e-15	24.69	67.33	77
GE001353	fepA	outer membrane receptor FepA	Ent	VF0562	VFG048518(gb|YP_002918367.1)	4.93e-17	23.68	63.9	82
GE001355	fepA	ferrienterobactin outer membrane transporter	Enterobactin	VF0228	VFG000923(gb|NP_752600)	2.08e-15	23.8	73.64	77
GE001356	bexA	ATP-dependent polysaccharide export protein BexA	Capsule	VF0043	VFG000696(gb|AAP42188)	2.08e-16	30.85	29.47	76
GE001358	ptxR	transcriptional regulator PtxR	pyoverdine	IA001	VFG044083(gb|NP_250948)	2.83e-12	29.96	85.22	63
GE001361	plc	phospholipase C	Phospholipase C	VF0470	VFG037176(gb|YP_001844723)	0	43.93	94.27	568
GE001371	CBU_1566	Coxiella Dot/Icm type IVB secretion system translocated effector	T4SS effectors	CVF803	VFG039536(gb|NP_820549)	1.36e-87	53.42	96.28	261
GE001382	cadF	outer membrane fibronectin-binding protein	CadF	VF0322	VFG001931(gb|NP_282616)	2.13e-14	28.3	90.7	66
GE001390	phoP	Possible two component system response transcriptional positive regulator PhoP	PhoP	VF0286	VFG001386(gb|NP_215271)	6.57e-06	35.71	69.83	40
GE001393	allS	DNA-binding transcriptional activator AllS	Allantion utilization	VF0572	VFG049114(gb|YP_002918199.1)	3.71e-08	27.68	83.28	50
GE001400	chpA	still frameshift probable component of chemotactic signal transduction system	Type IV pili	VF0082	VFG001231(gb|NP_249104)	4.14e-10	32.56	92.54	54
GE001403	napA	neutrophil activating protein NapA	HP-NAP	VF0052	VFG000307(gb|NP_207041)	2.41e-19	31.65	75.41	78
GE001405	iroN	salmochelin receptor IroN	IroN	VF0230	VFG000935(gb|NP_753164)	6.17e-09	27.49	18	56
GE001413	relA) Probable GTP pyrophosphokinase RelA (ATP:GTP 3'-pyrophosphotransferase) (PPGPP synthetase I) ((P)PPGPP synthetase	(GTP diphosphokinase)	RelA	VF0287	VFG001826(gb|NP_217099)	######	38.44	91.84	421
GE001415	cpsJ	glycosyl transferase CpsJ(V)	Capsule	VF0274	VFG001341(gb|NP_688173)	2.88e-09	27.74	18.71	56
GE001423	pilG	twitching motility protein PilG	Type IV pili	VF0082	VFG001225(gb|NP_249099)	8.75e-69	82.61	97.44	204
GE001424	pilH	twitching motility protein PilH	Type IV pili	VF0082	VFG001226(gb|NP_249100)	7.83e-40	49.58	98.33	129
GE001425	pilI	twitching motility protein PilI	Type IV pili	VF0082	VFG001227(gb|NP_249101)	1.3e-24	32.39	99.43	93
GE001426	pilJ	twitching motility protein PilJ	Type IV pili	VF0082	VFG001228(gb|NP_249102)	0	47.35	97.79	538
GE001427	chpA	still frameshift probable component of chemotactic signal transduction system	Type IV pili	VF0082	VFG001231(gb|NP_249104)	######	51.77	25.54	593
GE001428	chpB	probable methylesterase	Type IV pili	VF0082	VFG001232(gb|NP_249105)	9.56e-08	26.26	45.75	50
GE001429	chpC	probable chemotaxis protein	Type IV pili	VF0082	VFG001233(gb|NP_249106)	1.49e-15	31.29	91.77	68
GE001432	algU	alginate biosynthesis protein AlgZ/FimS	Alginate	VF0091	VFG000121(gb|NP_249453)	4.54e-06	25.84	80.48	42
GE001463	iroN	salmochelin receptor IroN	IroN	VF0230	VFG000935(gb|NP_753164)	6.59e-06	29.87	15.22	46
GE001465	lpg2936	Dot/Icm type IV secretion system effector	Dot/Icm	VF0156	VFG045607(gb|YP_096929)	8.99e-52	37.7	99.59	169
GE001466	pvdH	diaminobutyrate-2-oxoglutarate aminotransferase PvdH	pyoverdine	IA001	VFG016046(gb|NP_251103)	8.32e-33	28.41	88.56	127
GE001473	cylF	putative aminomethyltransferase CylF	Beta-hemolysin/cytolysin	CVF171	VFG005785(gb|NP_687688)	3.31e-08	23.7	72.36	51
GE001476	clbP	precolibactin peptidase ClbP	Colibactin	VF0573	VFG049162(gb|YP_006635488.1)	5.46e-21	27.64	68.63	92
GE001479	clbF	colibactin biosynthesis dehydrogenase ClbF	Colibactin	VF0573	VFG049152(gb|YP_006635478.1)	6.64e-08	25.38	30.34	52
GE001482	fepA	ferrienterobactin outer membrane transporter	Enterobactin	VF0228	VFG000923(gb|NP_752600)	1.25e-08	29.34	24.95	55
GE001486	gtrB	bactoprenol glucosyl transferase	LPS	VF0124	VFG000670(gb|NP_706258)	9.55e-90	42.67	87.9	272
GE001489	AHA_3493	hemolysin III	Hemolysin III	CVF793	VFG038904(gb|YP_857967)	1.26e-40	43.35	92.06	137
GE001501	phoR	Possible two component system response sensor kinase membrane associated PhoR	PhoP/R	CVF331	VFG009810(gb|NP_215272)	5.91e-24	35.91	20.83	103
GE001502	phoR	Possible two component system response sensor kinase membrane associated PhoR	PhoP/R	CVF331	VFG009810(gb|NP_215272)	2.88e-19	31.97	19.31	89
GE001503	phoR	Possible two component system response sensor kinase membrane associated PhoR	PhoP/R	CVF331	VFG009810(gb|NP_215272)	3.76e-19	34	18.73	89
GE001504	farB	fatty acid efflux system protein FarB	FarAB	VF0450	VFG036956(gb|NP_273368)	1.55e-37	28.68	83.72	141
GE001509	phzG1	phenazine biosynthesis protein PhzG, pyridoxamine 5'-phosphate oxidase	Phenazines biosynthesis	CVF536	VFG015521(gb|NP_252906)	9.77e-28	36.78	86.93	103
GE001530	cheB	chemotaxis-specific methylesterase CheB	peritrichous flagella	AI145	VFG043207(gb|YP_001006775)	3.7e-25	39.52	46.36	101
GE001534	bspR4	LuxR family transcriptional regulator	Quorum-sensing	VF0433	VFG002543(gb|YP_110332)	7.87e-17	33.33	66.14	74
GE001550	rpoN	RNA polymerase factor sigma-54	Pse5Ac7Ac, Pse5Ac7Am, Pse8OAc, Pse5Am7AcGlnAc	AI151	VFG043396(gb|YP_002344093)	1.94e-39	26.2	83.62	145
GE001551	hitC) iron(III	ABC transporter, ATP-binding protein	HitABC	VF0268	VFG000344(gb|NP_438273)	2.33e-28	30.93	94.56	108
GE001555	kpsF	D-arabinose 5-phosphate isomerase	Capsule	VF0323	VFG001971(gb|NP_282584)	1.11e-93	46.41	91.29	282
GE001561	wbkC	GDP-mannose 4,6-dehydratase / GDP-4-amino-4,6-dideoxy-D-mannose formyltransferase	LPS	VF0367	VFG002230(gb|NP_540335)	4.92e-11	31.25	51.15	57
GE001567	wcbM	D-glycero-d-manno-heptose 1-phosphate guanosyltransferase	Capsule I	VF0436	VFG002553(gb|YP_109389)	5.87e-18	28.33	97.46	77
GE001578	lidL	Dot/Icm type IV secretion system effector LidL	Dot/Icm	SS047	VFG010515(gb|YP_095205)	8.44e-25	32.84	78.17	100
GE001580	fpvA	ferripyoverdine receptor FpvA	Pyoverdine	VF0094	VFG000163(gb|NP_251088)	8.72e-29	25.56	87.82	120
GE001582	flaG	flagellar protein G (FlaG)	Pse5Ac7Ac	AI150	VFG006553(gb|NP_207125)	1.13e-06	35.14	40.78	43
GE001583	pvdN	pyoverdine biosynthesis protein PvdN	pyoverdine	IA001	VFG015994(gb|NP_251084)	3.59e-15	25.12	94.92	73
GE001585	irtA	Iron-regulated transporter IrtA	mycobactin	IA031	VFG009570(gb|NP_215864)	2.07e-13	31.36	85.83	66
GE001598	pilT	twitching motility protein PilT	Type IV pili	VF0082	VFG001223(gb|NP_249086)	0	79.06	97.97	565
GE001599	pilU	twitching motility protein PilU	Type IV pili	VF0082	VFG001224(gb|NP_249087)	0	67.57	96.54	541
GE001610	phzF1	phenazine biosynthesis protein PhzF, isomerase	Phenazines biosynthesis	CVF536	VFG015518(gb|NP_252904)	1.97e-22	29.9	94.88	91
GE001611	phzF1	phenazine biosynthesis protein PhzF, isomerase	Phenazines biosynthesis	CVF536	VFG015518(gb|NP_252904)	4.25e-26	31.4	97.26	102
GE001628	clbB	colibactin hybrid non-ribosomal peptide synthetase/type I polyketide synthase ClbB	Colibactin	VF0573	VFG049148(gb|YP_006635474.1)	9.06e-17	27.41	90.75	78
GE001650	plcD	phosphatidylserine/phosphatidylglycerophosphate/cardiolipin synthase	Phospholipase D	VF0469	VFG037203(gb|YP_001847849)	######	33.52	96.54	315
GE001651	cheB	chemotaxis-specific methylesterase	Flagella	VF0430	VFG002526(gb|YP_109897)	######	53.65	96.21	369
GE001652	cheR	chemotaxis protein methyltransferase	Flagella	VF0430	VFG002528(gb|YP_109899)	1.19e-46	39.36	88.73	158
GE001653	cdpA	cyclic di-GMP phosphodiesterase	CdpA	VF0432	VFG045467(gb|YP_107884)	2.24e-45	38.84	55.97	164
GE001654	cheW-2	chemotaxis protein CheW	ND	AI144	VFG043204(gb|YP_855930)	1.42e-28	36.88	81.87	103
GE001655	cheD	methyl-accepting chemotaxis protein CheD	peritrichous flagella	AI145	VFG043209(gb|YP_001006778)	1.25e-47	38.56	42.76	174
GE001656	cheA	chemotaxis protein CheA	peritrichous flagella	AI145	VFG043211(gb|YP_001006780)	######	36.65	97.91	360
GE001661	bfmR	biofilm-controlling response regulator	BfmRS	VF0463	VFG038219(gb|YP_001845364)	4.76e-37	36.96	96.6	130
GE001663	phoR	Possible two component system response sensor kinase membrane associated PhoR	PhoP/R	CVF331	VFG009810(gb|NP_215272)	1.09e-13	28.75	59.96	69
GE001674	acrA	acriflavine resistance protein A	AcrAB	VF0568	VFG049133(gb|YP_002918166.1)	######	53.85	90.98	365
GE001675	acrB	acriflavine resistance protein B	AcrAB	VF0568	VFG049144(gb|YP_002918165.1)	0	66.08	97.03	1377
GE001676	mtrE	multidrug efflux pump channel protein MtrE	MtrCDE	VF0451	VFG037010(gb|NP_274717)	######	40.76	95.77	347
GE001679	ptxR	transcriptional regulator PtxR	pyoverdine	IA001	VFG044083(gb|NP_250948)	2.36e-39	36.58	98.33	139
GE001681	exsA	type III secretion system regulatory protein ExsA	TTSS	VF0083	VFG000208(gb|NP_250404)	1.2e-10	23.72	67.99	58
GE001686	ptxR	transcriptional regulator PtxR	pyoverdine	IA001	VFG044083(gb|NP_250948)	2.66e-32	33.67	94.84	120
GE001692	fyuA	pesticin/yersiniabactin receptor protein	Yersiniabactin	VF0136	VFG000358(gb|NP_405467)	3.6e-08	24.88	25	53
GE001699	shuA	outer membrane heme/hemoglobin receptor ShuA	Shu	VF0256	VFG013064(gb|YP_405019)	4.39e-08	30.33	17.44	53
GE001705	exsA	Type III secretion system transcriptional regulator	T3SS	VF0479	VFG038332(gb|YP_001144282)	1.65e-06	25.71	20.63	46
GE001715	cdpA	cyclic di-GMP phosphodiesterase	CdpA	VF0432	VFG045467(gb|YP_107884)	2.19e-32	28.12	55.2	130
GE001720	clbP	precolibactin peptidase ClbP	Colibactin	VF0573	VFG049162(gb|YP_006635488.1)	9.89e-19	25.33	68.63	86
GE001722	cyaB	cyclolysin secretion ATP-binding protein	Cya	VF0028	VFG001269(gb|NP_879579)	1.05e-60	33.33	79.02	213
GE001729	ptxR	transcriptional regulator PtxR	pyoverdine	IA001	VFG044083(gb|NP_250948)	4.1e-09	26.33	84.85	53
GE001764	fleS/flrB	two-component sensor kinase	ND	AI144	VFG038759(gb|YP_857329)	3.36e-20	31.4	36.54	89
GE001765	pilR	two-component response regulator PilR	Type IV pili	VF0082	VFG001214(gb|NP_253237)	7.58e-87	41.16	99.72	270
GE001771	iap/cwhA	P60 extracellular protein, invasion associated protein Iap	p60	VF0068	VFG000070(gb|NP_464110)	6.55e-18	39.5	47.39	79
GE001772	iap/cwhA	P60 extracellular protein, invasion associated protein Iap	p60	VF0068	VFG000070(gb|NP_464110)	2.72e-17	38.98	72.67	75
GE001783	iroN	salmochelin receptor IroN	Sal	VF0563	VFG044334(gb|YP_002920266)	4.69e-13	30.8	21.99	70
GE001784	fleN	flagellar synthesis regulator FleN	polar flagella	AI149	VFG043350(gb|YP_095809)	6.82e-19	30.45	85.16	81
GE001790	CbuK_0688	Coxiella Dot/Icm type IVB secretion system translocated effector	T4SS effectors	CVF803	VFG046167(gb|YP_002305089.1)	6.17e-08	30.4	30.85	51
GE001809	fimV	putative Type IV pili related protein	Type IV pili	VF0082	VFG001230(gb|NP_251805)	3.65e-37	33.67	59.88	145
GE001813	allS	DNA-binding transcriptional activator AllS	Allantion utilization	VF0572	VFG049114(gb|YP_002918199.1)	4.56e-08	26.24	83.22	50
GE001818	algC	phosphomannomutase AlgC	Alginate biosynthesis	CVF522	VFG014893(gb|NP_254009)	4.4e-37	28.42	96.88	139
GE001821	cdpA	cyclic di-GMP phosphodiesterase	CdpA	VF0432	VFG045467(gb|YP_107884)	4.27e-66	34.21	60.74	229
GE001826	flmH	short chain dehydrogenase/reductase family oxidoreductase	Polar flagella	CVF786	VFG038839(gb|YP_858598)	1.13e-16	35.11	67.16	74
GE001843	CBU_1434	Coxiella Dot/Icm type IVB secretion system translocated effector	T4SS effectors	CVF803	VFG039491(gb|NP_820417)	2.57e-37	40.38	79.08	127
GE001856	sodB	superoxide dismutase	SodB	VF0169	VFG001867(gb|YP_096960)	1.66e-72	52.43	95.83	218
GE001858	flmH	short chain dehydrogenase/reductase family oxidoreductase	Polar flagella	CVF786	VFG038839(gb|YP_858598)	2.14e-08	27.46	77.64	50
GE001862	tppB	type IV pilus pseudopilin	Tap type IV pili	CVF783	VFG038479(gb|YP_855229)	1.79e-15	32.65	91.72	67
GE001863	tppC	type IV pilus pseudopilin	Tap type IV pili	CVF783	VFG038483(gb|YP_001140601)	1.39e-14	27.81	93.75	70
GE001865	tapY1	type IV pilus biogenesis protein	Tap type IV pili	CVF783	VFG038487(gb|YP_855232)	7.74e-96	29.34	91.55	331
GE001866	tppA	type IV pilus pseudopilin	Tap type IV pili	CVF783	VFG038475(gb|YP_855233)	4.6e-22	41.67	85.14	84
GE001867	fimT	type 4 fimbrial biogenesis protein FimT	Type IV pili	VF0082	VFG001215(gb|NP_253239)	1.78e-18	28.83	88.52	77
GE001870	virD4	type IV secretion system component VirD4	Rvh T4SS	VF0487	VFG039025(gb|YP_505894)	2.25e-90	33.33	93.18	294
GE001872	virB8	type IV secretion system protein VirB8	VirB type IV secretion system	VF0365	VFG002215(gb|NP_541009)	8.18e-29	32.62	67.84	110
GE001873	ptlF	Ptl Type IV secretion system outer membrane complex protein PtlF	Ptx	VF0026	VFG000022(gb|NP_882293)	1.93e-23	27.59	85.49	93
GE001874	virB10	type IV secretion system virB10 protein homolog	VirB/VirD4 type IV secretion system	VF0369	VFG002239(gb|YP_034059)	8.95e-43	33.14	83.21	153
GE001875	virB11	type IV secretion system protein ATPase VirB11	VirB type IV secretion system	VF0365	VFG002218(gb|NP_541012)	6.21e-88	46.05	82.95	270
GE001876	virB1	type IV secretion system attachment mediating protein VirB1 Homolog	VirB type IV secretion system	VF0365	VFG002208(gb|NP_541002)	1.06e-42	48.54	56.68	146
GE001877	virB2	type IV secretion system protein VirB2	VirB type IV secretion system	VF0365	VFG002209(gb|NP_541003)	1.84e-09	39.06	47.01	49
GE001878	virB3	type IV secretion system protein VirB3	VirB type IV secretion system	VF0365	VFG002210(gb|NP_541004)	2.38e-17	45.83	68.93	70
GE001879	virB4	type IV secretion system protein ATPase VirB4	VirB type IV secretion system	VF0365	VFG002211(gb|NP_541005)	0	40.07	97.18	582
GE001888	bopD	sugar-binding transcriptional regulator, LacI family	BopD	VF0362	VFG002197(gb|NP_814691)	5.14e-21	24.43	88.5	89
GE001897	wza	capsule polysaccharide export protein precursor	Capsule	VF0560	VFG048972(gb|YP_002920366.1)	2.81e-12	28.71	84.98	61
GE001899	wcaJ	undecaprenyl-phosphate glucose phosphotransferase	Capsule	VF0560	VFG048841(gb|YP_002920354.1)	8.85e-86	35.52	99.38	272
GE001903	lpsB/lpcC	Lipopolysaccharide core biosynthesis mannosyltransferase LpcC	LPS	CVF383	VFG011510(gb|NP_539426)	2.5e-11	31.61	42.11	61
GE001916	rhlB	rhamnosyltransferase chain B	Rhamnolipid	VF0089	VFG000155(gb|NP_252168)	9.93e-09	25.83	94.26	53
GE001919	clbF	colibactin biosynthesis dehydrogenase ClbF	Colibactin	VF0573	VFG049152(gb|YP_006635478.1)	5.25e-14	21.69	62.48	70
GE001923	fleS/flrB	flagellar sensor histidine kinase FleS	polar flagella	AI149	VFG043346(gb|YP_095789)	4.01e-15	26.8	24.16	74
GE001928	fleS/flrB	flagellar sensor histidine kinase FleS	polar flagella	AI149	VFG043346(gb|YP_095789)	5.2e-16	26.85	46.85	76
GE001932	flhF	flagellar biosynthesis regulator FlhF	Flagella	VF0114	VFG001895(gb|NP_281279)	1.68e-15	28.5	37.83	75
GE001933	chpD	probable transcriptional regulator	Type IV pili	VF0082	VFG001234(gb|NP_249107)	4.19e-08	32.94	34.87	49
GE001950	iroN	salmochelin receptor IroN	Sal	VF0563	VFG044334(gb|YP_002920266)	8.05e-09	28.65	17.59	56
GE001956	fepA	outer membrane receptor FepA	Ent	VF0562	VFG048518(gb|YP_002918367.1)	4.28e-10	26.67	23.49	60
GE001961	kdtB	lipopolysaccharide core biosynthesis protein	LPS	VF0056	VFG000320(gb|NP_208266)	7.79e-42	47.3	87.5	137
GE001965	dep/capD	gamma-glutamyltranspeptidase, required for polyglutamate anchoring to peptidoglycan	Capsule	VF0141	VFG000679(gb|AAF13660)	1.91e-45	28.33	87.02	165
GE001984	bopD	sugar-binding transcriptional regulator, LacI family	BopD	VF0362	VFG002197(gb|NP_814691)	3.88e-23	26.21	93.66	95
GE001985	acrB	acriflavine resistance protein B	AcrAB	VF0568	VFG049144(gb|YP_002918165.1)	0	49.71	96.21	1029
GE001986	acrA	acriflavine resistance protein A	AcrAB	VF0568	VFG049133(gb|YP_002918166.1)	7.59e-81	40.9	85.78	255
GE001989	pchR	transcriptional regulator PchR	Pyochelin	VF0095	VFG000167(gb|NP_252917)	3.33e-09	31.09	34.53	54
GE001991	farB	fatty acid efflux system protein FarB	FarAB	VF0450	VFG036956(gb|NP_273368)	5.69e-34	27.65	83.4	130
GE001992	cheA	histidine kinase CheA	Pse5Ac7Ac	AI150	VFG043373(gb|NP_207190)	1.21e-15	33.33	35.47	74
GE001993	bfmS	signal transduction histidine kinase	BfmRS	VF0463	VFG038234(gb|YP_001845365)	9.34e-19	28.38	16.06	88
GE001996	pvdH	diaminobutyrate-2-oxoglutarate aminotransferase PvdH	pyoverdine	IA001	VFG016046(gb|NP_251103)	2.5e-32	28.61	89.33	125
GE002003	cheY	chemotaxis regulatory protein	Pse5Ac7Ac, Pse5Ac7Am, Pse8OAc, Pse5Am7AcGlnAc	AI151	VFG043402(gb|YP_002344511)	6.39e-10	28.57	23.84	54
GE002008	pvdH	diaminobutyrate-2-oxoglutarate aminotransferase PvdH	pyoverdine	IA001	VFG016046(gb|NP_251103)	1.81e-21	27.42	88.57	93
GE002010	farA	fatty acid efflux system protein FarA	FarAB	VF0450	VFG036938(gb|NP_273367)	7.31e-35	35.56	77.94	130
GE002011	farB	fatty acid efflux system protein FarB	FarAB	VF0450	VFG036956(gb|NP_273368)	3.37e-72	29.9	93.56	239
GE002012	adeH	outer membrane protein	AdeFGH efflux pump	VF0504	VFG037735(gb|YP_001847165)	6.93e-40	30.37	93.44	148
GE002013	fbpC) iron(III	ABC transporter, ATP-binding protein	FbpABC	VF0272	VFG001206(gb|NP_273675)	2.49e-66	46.77	64.63	214
GE002015	fbpB) iron(III	ABC transporter, permease protein	FbpABC	VF0272	VFG000249(gb|NP_273676)	1.66e-08	28.18	63.83	51
GE002020	hlyA	Hemolysin A	Hemolysin, HlyA	CVF792	VFG038900(gb|YP_857314)	4.4e-23	23.77	88.01	95
GE002025	chuW	Putative oxygen independent coproporphyrinogen III oxidase	Chu	VF0227	VFG000919(gb|NP_756176)	6.03e-06	22.22	39.79	45
GE002038	cheD	methyl-accepting chemotaxis protein CheD	peritrichous flagella	AI145	VFG043209(gb|YP_001006778)	3.67e-59	41.49	55.8	205
GE002039	cheW-2	chemotaxis protein CheW	ND	AI144	VFG043204(gb|YP_855930)	1.42e-28	34.93	85.8	103
GE002053	pvdO	pyoverdine biosynthesis protein PvdO	pyoverdine	IA001	VFG016005(gb|NP_251085)	2.45e-47	36.9	46.24	166
GE002064	cylG	3-ketoacyl-ACP-reductase CylG	Beta-hemolysin/cytolysin	CVF171	VFG005767(gb|NP_687682)	1.97e-59	42.15	96.34	188
GE002067	cdpA	cyclic di-GMP phosphodiesterase	CdpA	VF0432	VFG045467(gb|YP_107884)	1.42e-25	25.35	59.8	108
GE002078	shuV	ATP-binding component of hemin transport system	Shu	VF0256	VFG013070(gb|YP_405013)	9.05e-18	30.42	35.43	80
GE002081	sodB	superoxide dismutase	SodB	VF0169	VFG001867(gb|YP_096960)	1.39e-67	48.96	94.09	206
GE002085	cdpA	cyclic di-GMP phosphodiesterase	CdpA	VF0432	VFG045467(gb|YP_107884)	8.92e-70	35.37	60.99	238
GE002102	allB	allantoinase	Allantion utilization	VF0572	VFG049120(gb|YP_002918207.1)	5.92e-46	28.06	95.77	164
GE002105	entS	enterobactin exporter, iron-regulated	enterobactin	IA019	VFG044165(gb|NP_752609)	7.96e-12	27.15	85.1	63
GE002129	ybtQ	yersiniabactin ABC transporter ATP-binding/permease protein YbtQ	Yersiniabactin	VF0136	VFG000366(gb|NP_405475)	2.2e-31	26.1	80.24	125
GE002130	msbA	lipid transporter ATP-binding/permease	LOS	CVF494	VFG013248(gb|NP_438233)	2.08e-31	30.88	50	125
GE002136	ccmF	cytochrome c heme lyase subunit CcmF	Cytochrome c muturation (ccm) locus	CVF358	VFG010882(gb|YP_094896)	0	49.53	99.22	583
GE002137	ccmE	cytochrome c-type biogenesis protein CcmE, heme chaperone	Cytochrome c muturation (ccm) locus	CVF358	VFG010878(gb|YP_094895)	3.81e-29	43.26	88.82	103
GE002139	ccmC	cytochrome c-type biogenesis protein CcmC, putative heme lyase for CcmE	CcmC	VF0292	VFG001856(gb|YP_094893)	1.26e-57	41.74	96.39	184
GE002140	ccmB	ABC transporter involved in cytochrome c biogenesis, CcmB subunit	Cytochrome c muturation (ccm) locus	CVF358	VFG010866(gb|YP_094892)	4.7e-25	40.22	76.19	97
GE002141	ccmA	ABC transporter involved in cytochrome c biogenesis, ATPase component CcmA	Cytochrome c muturation (ccm) locus	CVF358	VFG010862(gb|YP_094891)	3.3e-29	36.17	85.98	108
GE002142	Cj1437c	aminotransferase	Capsule	VF0323	VFG001965(gb|NP_282578)	5.58e-10	20.87	53.4	57
GE002152	bopD	sugar-binding transcriptional regulator, LacI family	BopD	VF0362	VFG002197(gb|NP_814691)	9.37e-25	23.77	96.47	99
GE002171	wecA	undecaprenyl-phosphate alpha-N-acetylglucosaminyltransferase	LOS	CVF494	VFG013508(gb|NP_439858)	1.32e-19	28.41	69.23	85
GE002172	cap8D	capsular polysaccharide synthesis enzyme Cap8D	Capsule	VF0003	VFG001300(gb|NP_644942)	######	39.68	87.87	370
GE002173	galU	glucosephosphate uridylyltransferase	LOS	CVF494	VFG013346(gb|NP_438972)	2.78e-87	48.1	94.61	264
GE002182	bprB	two-component response regulator	Bsa T3SS	VF0428	VFG002440(gb|YP_111528)	1.26e-29	36.41	92.49	109
GE002184	chpD	probable transcriptional regulator	Type IV pili	VF0082	VFG001234(gb|NP_249107)	5.55e-15	35.71	62.58	67
GE002192	ideR	Iron-dependent repressor and activator IdeR	IdeR	VF0300	VFG001406(gb|NP_217227)	2.31e-06	33.33	64.52	42
GE002200	flmH	short chain dehydrogenase/reductase family oxidoreductase	Polar flagella	CVF786	VFG038839(gb|YP_858598)	1.51e-20	30.92	98.41	85
GE002209	phoR	Possible two component system response sensor kinase membrane associated PhoR	PhoP/R	CVF331	VFG009810(gb|NP_215272)	1.35e-21	35.25	21.12	96
GE002213	pvcD	paerucumarin biosynthesis protein PvcD	pyoverdine	IA001	VFG044082(gb|NP_250947)	3.53e-07	33.33	48.37	45
GE002214	pvcD	paerucumarin biosynthesis protein PvcD	pyoverdine	IA001	VFG044082(gb|NP_250947)	6.81e-06	22.22	76.56	40
GE002215	adeF	membrane-fusion protein	AdeFGH efflux pump	VF0504	VFG037705(gb|YP_001847163)	5.93e-21	28.53	80.64	90
GE002216	mtrD	multiple transferable resistance system protein MtrD	MtrCDE	VF0451	VFG036992(gb|NP_274718)	5.17e-75	25.43	97.68	267
GE002217	acrB	acriflavine resistance protein B	AcrAB	VF0568	VFG049144(gb|YP_002918165.1)	2.53e-58	23.87	92.8	215
GE002223	hitC) iron(III	ABC transporter, ATP-binding protein	HitABC	VF0268	VFG000344(gb|NP_438273)	9.14e-49	31.32	92.58	167
GE002234	fbpC) iron(III	ABC transporter, ATP-binding protein	FbpABC	VF0272	VFG001206(gb|NP_273675)	1.18e-30	36.71	83.33	115
GE002239	msbA	lipid transporter ATP-binding/permease	LOS	CVF494	VFG013248(gb|NP_438233)	######	37.46	97.11	420
GE002240	lpxK	tetraacyldisaccharide 4'-kinase	LOS	CVF494	VFG013242(gb|NP_438232)	9.31e-68	37.46	96.58	216
GE002241	kdsB	3-deoxy-manno-octulosonate cytidylyltransferase	LOS	CVF494	VFG013236(gb|NP_438231)	6.12e-75	47.43	92.94	229
GE002242	wzb	protein tyrosine phosphatase	Capsule	VF0560	VFG048962(gb|YP_002920365.1)	2.19e-21	34.72	92.86	83
GE002246	chuW	Putative oxygen independent coproporphyrinogen III oxidase	Chu	VF0227	VFG000919(gb|NP_756176)	3.12e-17	23.64	65.96	80
GE002247	tviB	Vi polysaccharide biosynthesis protein, UDP-glucose/GDP-mannose dehydrogenase TviB	Vi antigen	VF0101	VFG000431(gb|NP_458740)	######	51.43	97.44	469
GE002249	mip	macrophage infectivity potentiator Mip	Mip	VF0153	VFG001864(gb|YP_094827)	7.37e-11	33.65	72.03	55
GE002252	bprB	two-component response regulator	Bsa T3SS	VF0428	VFG002440(gb|YP_111528)	2.95e-26	30.95	95.81	100
GE002271	zot	zona occludens toxin	Zot	VF0129	VFG000109(gb|NP_231101)	4.98e-07	21.29	54.09	48
GE002297	AHA_1389	CobQ/CobB/MinD/ParA family protein	Polar flagella	CVF786	VFG038722(gb|YP_855928)	1.39e-10	26.97	47.66	58
GE002312	oatA	peptidoglycan O-acetyltransferase	OatA	VF0441	VFG032992(gb|NP_464816)	6.52e-07	23.56	90.45	47
GE002330	algZ	sigma factor AlgU	Alginate	VF0091	VFG000120(gb|NP_253949)	5.56e-10	28.32	35.46	58
GE002331	algR	alginate biosynthesis regulatory protein AlgR	Alginate	VF0091	VFG000119(gb|NP_253948)	2.74e-21	30.77	97.42	87
GE002333	cgs	cyclic beta 1-2 glucan synthetase	C<beta>G	VF0366	VFG002219(gb|NP_540754)	0	38.02	98.17	1809
GE002334	fleS/flrB	flagellar sensor histidine kinase FleS	polar flagella	AI149	VFG043346(gb|YP_095789)	1.7e-14	28.63	55.04	71
GE002335	fleR/flrC	sigma 54-dependent response regulator	polar flagella	AI149	VFG043345(gb|YP_095788)	8.03e-10	29.91	97.37	52
GE002339	cheD	methyl-accepting chemotaxis protein CheD	peritrichous flagella	AI145	VFG043209(gb|YP_001006778)	1.54e-79	56.55	40.74	264
GE002340	fptA	Fe(III)-pyochelin receptor precursor	Pyochelin	VF0095	VFG000164(gb|NP_252911)	6.34e-08	25.98	18.04	52
GE002355	bplA	probable oxidoreductase	LPS	VF0033	VFG000038(gb|NP_878995)	9.63e-10	23.29	62.32	56
GE002358	flgS	signal transduction histidine kinase	Pse5Ac7Ac, Pse5Ac7Am, Pse8OAc, Pse5Am7AcGlnAc	AI151	VFG043398(gb|YP_002344200)	1e-10	26.21	54.14	59
GE002361	nagI	hyaluronidase	mu-toxin	VF0389	VFG002278(gb|NP_561797)	2.2e-77	25.97	97.4	267
GE002364	mycP3	Type VII secretion system membrane-anchored mycosin MycP3	ESX-3	VF0521	VFG022146(gb|NP_214805)	1.42e-07	29.17	32.15	51
GE002365	shdA	AIDA autotransporter-like protein	ShdA	VF0398	VFG002305(gb|NP_461448)	8.85e-31	30.23	16.31	131
GE002366	cdpA	cyclic di-GMP phosphodiesterase	CdpA	VF0432	VFG045467(gb|YP_107884)	6.58e-40	34.33	44.76	150
GE002368	cheB	chemotaxis-specific methylesterase CheB	peritrichous flagella	AI145	VFG043207(gb|YP_001006775)	1.48e-22	35.93	46.29	93
GE002374	ddhA	glucose-1-phosphate cytidylyltransferase	O-antigen	VF0392	VFG002377(gb|YP_001007269)	######	60.7	99.61	353
GE002375	Cj1427c	sugar-nucleotide epimerase/dehydratease	Capsule	VF0323	VFG001955(gb|NP_282568)	1.35e-23	27.85	87.11	96
GE002376	wbcA	sugar epimerase	O-antigen	VF0392	VFG002375(gb|YP_001007267)	8.59e-26	31.18	86.53	97
GE002385	cheY	chemotaxis response regulator CheY	Pse5Ac7Ac	AI150	VFG043386(gb|NP_207858)	2.83e-06	25.62	61.05	41
GE002397	flmH	short chain dehydrogenase/reductase family oxidoreductase	Polar flagella	CVF786	VFG038839(gb|YP_858598)	3.38e-16	33.51	64.38	73
GE002402	feoB	ferrous iron transporter B	FeoAB	VF0160	VFG001859(gb|YP_096662)	9.84e-06	30.4	24.73	44
GE002406	pilW	type IV fimbrial biogenesis and twitching motility protein PilW	Type IV pili	CVF189	VFG006171(gb|NP_274328)	1.48e-21	30.94	80	88
GE002410	clbD	colibactin biosynthesis dehydrogenase ClbD	Colibactin	VF0573	VFG049150(gb|YP_006635476.1)	1.46e-28	29.21	36.08	114
GE002417	essC	type VII secretion system protein EssC, FtsK/SpoIIIE family ATPase	Type VII secretion system	VF0403	VFG002409(gb|NP_645079)	4.73e-20	31.53	36.31	92
GE002422	clpE	ATP-dependent protease	ClpE	VF0073	VFG000080(gb|NP_464522)	######	42.81	75.66	512
GE002427	tlpC	membrane-bound chemoreceptor	Pse5Ac7Ac	AI150	VFG043365(gb|NP_206882)	1.6e-20	31.3	56.57	90
GE002429	cdpA	cyclic di-GMP phosphodiesterase	CdpA	VF0432	VFG045467(gb|YP_107884)	1.41e-79	32.75	60.45	269
GE002430	fleS/flrB	flagellar sensor histidine kinase FleS	polar flagella	AI149	VFG043346(gb|YP_095789)	4.72e-06	32.97	10.9	46
GE002431	cdpA	cyclic di-GMP phosphodiesterase	CdpA	VF0432	VFG045467(gb|YP_107884)	8.96e-53	30.77	70.68	188
GE002432	fleS/flrB	two-component sensor kinase	ND	AI144	VFG038759(gb|YP_857329)	9.56e-16	25.76	64.46	75
GE002434	flgM	anti-sigma-D factor	ND	AI144	VFG038823(gb|YP_857350)	5.83e-13	42.42	63.11	58
GE002435	flgA	flagellar basal body P-ring biosynthesis protein FlgA	Deoxyhexose linking sugar, 209 Da capping structure	AI138	VFG014642(gb|NP_252040)	1.56e-22	32.39	78.97	90
GE002436	cheV	CheV	ND	AI144	VFG038815(gb|YP_857348)	1.94e-96	49.34	94.9	288
GE002437	flgB	flagellar basal body rod protein FlgB	Flagella	VF0157	VFG001991(gb|YP_095247)	8.32e-29	40.6	99.25	102
GE002438	flgC	flagellar basal body rod protein FlgC	ND	AI144	VFG038803(gb|YP_857345)	6.5e-42	48.55	99.26	136
GE002439	flgD	flagellar basal-body rod modification protein FlgD	Flagella	VF0273	VFG001237(gb|NP_249770)	8.5e-41	39.9	92.31	139
GE002440	flgE	flagellar hook protein FlgE	Flagella	VF0273	VFG001238(gb|NP_249771)	######	42.46	99.75	318
GE002441	flgF	flagellar basal body rod protein FlgF	Flagella	VF0430	VFG002512(gb|YP_106901)	5.95e-56	42.19	98.8	180
GE002442	flgG	flagellar basal-body rod protein FlgG	Flagella	VF0273	VFG001240(gb|NP_249773)	######	60.92	99.62	318
GE002443	lfgH	lateral flagellar L-ring protein, LfgH	Lateral flagella	VF0474	VFG038877(gb|YP_001140298)	2.69e-52	40.53	96.96	169
GE002444	flgI	flagellar P-ring protein precursor FlgI	Flagella	VF0273	VFG001242(gb|NP_249775)	######	65.42	92.74	451
GE002445	flgJ	flagellar rod assembly protein/muramidase FlgJ	Flagella	VF0273	VFG001243(gb|NP_249776)	7.61e-48	34.66	89.11	167
GE002446	flgK	flagellar hook-associated protein 1 FlgK	Flagella	VF0157	VFG001999(gb|YP_095256)	3.63e-82	31.43	99.84	271
GE002447	flgL	flagellar hook-associated protein 3 FlgL	Flagella	VF0430	VFG002518(gb|YP_106908)	1.48e-52	33.25	98.75	180
GE002448	fliC	flagellin	Flagella	VF0157	VFG001854(gb|YP_095369)	######	45.8	99.5	308
GE002449	fliD	flagellar capping protein FliD	Flagella	VF0273	VFG001247(gb|NP_249785)	1.18e-43	32.33	89.82	158
GE002450	fliS	flagellar protein FliS	Flagella	VF0394	VFG002325(gb|YP_001006732)	2.38e-30	46.46	91.24	106
GE002453	bprB	two-component response regulator	Bsa T3SS	VF0428	VFG002440(gb|YP_111528)	1.39e-33	35.92	96.67	119
GE002455	rpoN	RNA polymerase factor sigma-54	Pse5Ac7Ac, Pse5Ac7Am, Pse8OAc, Pse5Am7AcGlnAc	AI151	VFG043396(gb|YP_002344093)	1.75e-29	27.81	64.03	116
GE002456	cheB-2	chemotaxis-specific methylesterase	ND	AI144	VFG038710(gb|YP_855925)	1.61e-11	33.65	80.31	57
GE002457	fleQ	transcriptional regulator FleQ	polar flagella	AI149	VFG043319(gb|YP_094888)	######	45.05	98.19	396
GE002458	bplC	lipopolysaccharide biosynthesis protein	LPS	VF0033	VFG000036(gb|NP_878993)	5.19e-45	33.63	79.81	159
GE002462	Cj1434c	sugar transferase	Capsule	VF0323	VFG001962(gb|NP_282575)	6.54e-11	29.03	12.76	62
GE002463	fliE	flagellar hook-basal body complex protein FliE	Flagella	VF0273	VFG001250(gb|NP_249791)	2.53e-25	50.53	73.98	92
GE002464	fliF	flagellar M-ring protein FliF	Flagella	VF0273	VFG001251(gb|NP_249792)	######	38.34	96.34	375
GE002465	fliG	flagellar motor switch protein G	Flagella	VF0273	VFG001252(gb|NP_249793)	######	58.97	99.7	400
GE002466	fliH	flagellar assembly protein H	Flagella	VF0157	VFG002004(gb|YP_095784)	2.79e-14	21.74	75.73	65
GE002467	fliI	flagellum-specific ATP synthase	ND	AI144	VFG038638(gb|YP_855907)	0	63.7	90.61	515
GE002468	fliJ	flagellar protein FliJ	Flagella	VF0430	VFG002498(gb|YP_106854)	9.25e-12	33.33	92.05	56
GE002469	fliK	flagellar hook-length control protein FliK	Deoxyhexose linking sugar, 209 Da capping structure	AI138	VFG014473(gb|NP_250132)	1.9e-16	37.08	20.66	77
GE002470	fliL	flagellar basal body-associated protein FliL	ND	AI144	VFG038650(gb|YP_855910)	3.78e-23	34.59	87.79	89
GE002471	fliM	flagellar motor switch protein FliM	ND	AI144	VFG038654(gb|YP_855911)	######	56.19	95.85	389
GE002472	fliN	flagellar motor switch protein FliN	Flagella	VF0273	VFG001257(gb|NP_250135)	1.88e-43	79.76	74.11	139
GE002473	fliO	flagellar protein FliO	Flagella	VF0273	VFG001258(gb|NP_250136)	1.57e-15	40	76.3	67
GE002474	fliP	flagellar biosynthetic protein FliP	Flagella	VF0273	VFG001259(gb|NP_250137)	2.18e-81	59.05	74.64	246
GE002475	fliQ	flagellar biosynthetic protein FliQ	Flagella	VF0273	VFG001260(gb|NP_250138)	5.46e-14	40.45	71.54	61
GE002476	fliR	flagellar biosynthetic protein FliR	Flagella	VF0273	VFG001261(gb|NP_250139)	3.14e-40	40.76	90.11	139
GE002478	cdpA	cyclic di-GMP phosphodiesterase	CdpA	VF0432	VFG045467(gb|YP_107884)	8.01e-06	27.62	17.23	46
GE002479	cdpA	cyclic di-GMP phosphodiesterase	CdpA	VF0432	VFG045467(gb|YP_107884)	1.22e-80	39.95	60.63	268
GE002480	flhB	flagellar biosynthetic protein FlhB	Flagella	VF0273	VFG001262(gb|NP_250140)	5.06e-96	44.09	96.28	292
GE002481	flhA	flagellar biosynthesis protein FlhA	Flagella	VF0273	VFG001263(gb|NP_250143)	0	58.75	97.27	781
GE002482	flhF	flagellar biosynthesis protein FlhF	ND	AI144	VFG038686(gb|YP_855919)	1.51e-62	40.7	50.63	213
GE002483	fleN	flagellar synthesis regulator FleN	Flagella	VF0273	VFG001265(gb|NP_250145)	######	56.72	90.82	299
GE002484	fliA	flagellar biosynthesis sigma factor FliA	Deoxyhexose linking sugar, 209 Da capping structure	AI138	VFG014629(gb|NP_250146)	7.9e-78	50.83	92.55	236
GE002485	cheY	chemotaxis protein CheY	ND	AI144	VFG038698(gb|YP_855922)	5.34e-71	77.95	96.92	209
GE002486	cheZ	chemotaxis protein CheZ	ND	AI144	VFG038702(gb|YP_855923)	2.35e-16	31.86	74.04	72
GE002487	cheA-2	chemotaxis protein CheA	ND	AI144	VFG038706(gb|YP_855924)	######	54.45	68.6	420
GE002500	motC	flagellar motor protein	Deoxyhexose linking sugar, 209 Da capping structure	AI138	VFG014707(gb|NP_250151)	8.71e-85	53.88	88.41	255
GE002501	motD	flagellar motor protein	Deoxyhexose linking sugar, 209 Da capping structure	AI138	VFG014720(gb|NP_250152)	4.21e-67	39.48	83.33	213
GE002502	AHA_1389	CobQ/CobB/MinD/ParA family protein	Polar flagella	CVF786	VFG038722(gb|YP_855928)	2.59e-69	41.6	99.23	215
GE002503	cheW	purine-binding chemotaxis protein CheW	peritrichous flagella	AI145	VFG043210(gb|YP_001006779)	1.46e-16	34.07	32.52	74
GE002505	cheY1	chemotaxis two-component response regulator CheY1	Flagella	VF0430	VFG002532(gb|YP_109903)	7.68e-29	47.71	89.26	101
GE002506	cheA	chemotaxis protein CheA	peritrichous flagella	AI145	VFG043211(gb|YP_001006780)	######	46.03	98.35	530
GE002507	cheD	methyl-accepting chemotaxis protein CheD	peritrichous flagella	AI145	VFG043209(gb|YP_001006778)	2.95e-95	61.62	39.26	307
GE002509	cheD	methyl-accepting chemotaxis protein CheD	peritrichous flagella	AI145	VFG043209(gb|YP_001006778)	4.65e-92	62.09	37.21	298
GE002510	cheD	methyl-accepting chemotaxis protein CheD	peritrichous flagella	AI145	VFG043209(gb|YP_001006778)	4.73e-90	61.15	31.75	297
GE002512	cheD	methyl-accepting chemotaxis protein CheD	peritrichous flagella	AI145	VFG043209(gb|YP_001006778)	1.48e-96	58.6	60.78	304
GE002513	cheD	methyl-accepting chemotaxis protein CheD	peritrichous flagella	AI145	VFG043209(gb|YP_001006778)	6.64e-97	62.24	39.17	311
GE002514	cheD	methyl-accepting chemotaxis protein CheD	peritrichous flagella	AI145	VFG043209(gb|YP_001006778)	1.83e-91	57.93	35.92	300
GE002515	cheD	methyl-accepting chemotaxis protein CheD	peritrichous flagella	AI145	VFG043209(gb|YP_001006778)	6.43e-96	62.16	39.23	309
GE002516	cheD	methyl-accepting chemotaxis protein CheD	peritrichous flagella	AI145	VFG043209(gb|YP_001006778)	3.49e-88	59.46	33.15	291
GE002518	cheW	chemotaxis protein CheW	Flagella	VF0430	VFG002530(gb|YP_109901)	9.4e-61	59.33	92.55	186
GE002520	cheD	methyl-accepting chemotaxis protein CheD	peritrichous flagella	AI145	VFG043209(gb|YP_001006778)	3.61e-94	57.68	39.97	305
GE002521	cheR	chemotaxis protein methyltransferase	Flagella	VF0430	VFG002528(gb|YP_109899)	2.45e-83	49.44	91.7	254
GE002522	cheD	chemoreceptor glutamine deamidase CheD	Flagella	VF0430	VFG002527(gb|YP_109898)	2.5e-55	54.43	77.27	176
GE002523	cheB	chemotaxis-specific methylesterase CheB	peritrichous flagella	AI145	VFG043207(gb|YP_001006775)	######	52.87	96.93	379
GE002524	cdpA	cyclic di-GMP phosphodiesterase	CdpA	VF0432	VFG045467(gb|YP_107884)	1.35e-75	37.24	55.66	255
GE002531	pchD	pyochelin biosynthesis protein PchD	Pyochelin	VF0095	VFG000168(gb|NP_252918)	1.27e-39	25.23	94.64	149
GE002533	bfmS	signal transduction histidine kinase	BfmRS	VF0463	VFG038234(gb|YP_001845365)	4.28e-15	27.59	31.27	75
GE002535	cheY	chemotaxis regulatory protein	Pse5Ac7Ac, Pse5Ac7Am, Pse8OAc, Pse5Am7AcGlnAc	AI151	VFG043402(gb|YP_002344511)	1.96e-13	28.69	31.48	64
GE002554	feoB	ferrous iron transporter B	FeoAB	VF0160	VFG001859(gb|YP_096662)	8.62e-80	29.62	96.77	267
GE002558	cylG	3-ketoacyl-ACP-reductase CylG	Beta-hemolysin/cytolysin	CVF171	VFG005767(gb|NP_687682)	5.15e-30	30.8	95.31	111
GE002578	gmhB	D,D-heptose 1,7-bisphosphate phosphatase	LOS	CVF396	VFG011823(gb|NP_282299)	1.8e-11	27.15	39.47	59
GE002579	Cj1437c	aminotransferase	Capsule	VF0323	VFG001965(gb|NP_282578)	7.45e-22	28.19	61.88	92
GE002595	fhaB	filamentous hemagglutinin/adhesin	FHA	VF0025	VFG000001(gb|NP_880571)	1.85e-34	28.23	21.15	144
GE002596	fhaC	hemolysin activator-like protein	FHA	VF0025	VFG001272(gb|NP_880575)	6.02e-23	24.09	92.05	99
GE002599	Cj1420c	methyltransferase	Capsule biosynthesis and transport	CVF393	VFG011677(gb|NP_282561)	1.64e-17	31.88	51.76	76
GE002608	algB	two-component response regulator AlgB	Alginate	VF0091	VFG000116(gb|NP_254170)	9.54e-18	38.61	52.36	77
GE002610	cdpA	cyclic di-GMP phosphodiesterase	CdpA	VF0432	VFG045467(gb|YP_107884)	4.35e-51	30.87	69.42	184
GE002625	lbtC	LbtC inner membrane protein required for import of Legiobactin	Legiobactin	VF0291	VFG045330(gb|YP_095353)	6.88e-06	27.74	27.79	45
GE002636	allS	DNA-binding transcriptional activator AllS	Allantion utilization	VF0572	VFG049114(gb|YP_002918199.1)	8.01e-06	29.57	54.8	43
GE002639	CBU_1789	Coxiella Dot/Icm type IVB secretion system translocated effector	T4SS effectors	CVF803	VFG039623(gb|NP_820769)	6.88e-53	33.09	91.42	175
GE002652	allS	DNA-binding transcriptional activator AllS	Allantion utilization	VF0572	VFG049114(gb|YP_002918199.1)	7.57e-34	30.96	87.26	125
GE002654	cheD	methyl-accepting chemotaxis protein CheD	peritrichous flagella	AI145	VFG043209(gb|YP_001006778)	1.53e-50	51.78	31.11	182
GE002662	fyuA	yersiniabactin receptor FyuA	Ybt	VF0564	VFG044333(gb|YP_002920253)	4.11e-13	23.19	56.38	69
GE002679	bsc1	bifunctional; ribulose 5-phosphate reductase; CDP-ribitol pyrophosphorylase	Capsule	VF0043	VFG000700(gb|AAP42192)	1.08e-15	27.57	83.4	73
GE002683	kdsA	2-dehydro-3-deoxyphosphooctonate aldolase	LPS	CVF383	VFG011414(gb|NP_539767)	6.19e-89	60.16	92.39	266
GE002689	lpg2628	Dot/Icm type IV secretion system effector	Dot/Icm	VF0156	VFG045590(gb|YP_096633)	1.58e-12	26.03	81.82	62
GE002692	hlyA	Hemolysin A	Hemolysin, HlyA	CVF792	VFG038900(gb|YP_857314)	1.48e-53	29.22	94.04	184
GE002697	barB	siderophore efflux system of the ABC superfamily	Acinetobactin	VF0467	VFG037260(gb|YP_001847232)	7.97e-21	31.87	31.98	92
GE002701	wbkA	mannosyltransferase	LPS	VF0367	VFG002224(gb|NP_540321)	3.32e-10	28.17	37.57	57
GE002702	bplH	putative glycosyl transferase	LPS	VF0033	VFG000031(gb|NP_878988)	7.59e-07	26.25	79.68	47
GE002708	cpsO	glycosyl transferase CpsO(V)	Capsule	VF0274	VFG001342(gb|NP_688174)	1.89e-17	38.1	33.33	78
GE002710	bplC	lipopolysaccharide biosynthesis protein	LPS	VF0033	VFG000036(gb|NP_878993)	1.47e-70	38.42	95.71	226
GE002717	algU	alginate biosynthesis protein AlgZ/FimS	Alginate	VF0091	VFG000121(gb|NP_249453)	1.39e-17	27.81	90.16	74
GE002719	cylA	cytolysin activator	Cytolysin	VF0356	VFG002177(gb|AAM75253)	3.63e-09	30.17	26.08	55
GE002720	ccmC	cytochrome c-type biogenesis protein CcmC, putative heme lyase for CcmE	CcmC	VF0292	VFG001856(gb|YP_094893)	4.3e-72	49.17	94.05	222
GE002722	ccmE	cytochrome c-type biogenesis protein CcmE, heme chaperone	Cytochrome c muturation (ccm) locus	CVF358	VFG010878(gb|YP_094895)	1.97e-29	41.01	87.82	104
GE002723	ccmF	cytochrome c heme lyase subunit CcmF	Cytochrome c muturation (ccm) locus	CVF358	VFG010882(gb|YP_094896)	0	48.21	95.49	560
GE002727	fleS/flrB	flagellar sensor histidine kinase FleS	polar flagella	AI149	VFG043346(gb|YP_095789)	1.06e-15	28.25	44.61	75
GE002729	fleR	two-component response regulator	Flagella	VF0273	VFG001249(gb|NP_249790)	1.93e-16	38.94	90.32	72
GE002730	fleS/flrB	flagellar sensor histidine kinase FleS	polar flagella	AI149	VFG043346(gb|YP_095789)	6.06e-20	29.34	25.03	89
GE002745	ptxR	transcriptional regulator PtxR	pyoverdine	IA001	VFG044083(gb|NP_250948)	5.94e-36	33.66	88.32	131
GE002754	cdsD	Type III secretion system inner membrane ring complex protein CdsD	TTSS	VF0344	VFG002139(gb|NP_220183)	6.14e-09	39.53	27.46	53
GE002771	Cj1437c	aminotransferase	Capsule	VF0323	VFG001965(gb|NP_282578)	5.97e-24	25.55	70.86	98
GE002774	iroE	siderophore esterase IroE	Sal	VF0563	VFG044322(gb|YP_002919453)	1.05e-22	36.46	47.47	93
GE002788	phzS	flavin dependent hydroxylase PhzS	Pyocyanin	VF0100	VFG000173(gb|NP_252907)	5.54e-07	26.99	77.19	48
GE002796	shuV	ATP-binding component of hemin transport system	Shu	VF0256	VFG013070(gb|YP_405013)	2.11e-10	34.36	25.28	58
GE002799	coxH3	Coxiella Dot/Icm type IVB secretion system translocated effector	Dot/Icm	SS051	VFG039615(gb|NP_820749)	3.23e-07	29.85	74.29	45
GE002805	mip	macrophage infectivity potentiator Mip	Mip	VF0153	VFG001864(gb|YP_094827)	8.67e-41	38.78	99.57	139
GE002817	msbA	lipid transporter ATP-binding/permease	LOS	CVF494	VFG013248(gb|NP_438233)	3e-29	36.59	71.74	114
GE002826	clbF	colibactin biosynthesis dehydrogenase ClbF	Colibactin	VF0573	VFG049152(gb|YP_006635478.1)	1.35e-43	32.75	87.17	154
GE002830	manAoAg	mannose-6-phosphate isomerase	LPS	VF0367	VFG002221(gb|NP_540311)	1.17e-10	24.61	93.02	59
GE002832	gluP	glucose/galactose transporter	LPS	VF0056	VFG000313(gb|NP_207965)	######	44.2	93.58	308
GE002833	bopD	sugar-binding transcriptional regulator, LacI family	BopD	VF0362	VFG002197(gb|NP_814691)	3.37e-20	24.4	87.53	87
GE002837	algD	GDP-mannose 6-dehydrogenase AlgD	Alginate	VF0091	VFG000122(gb|NP_252230)	3.08e-66	35.44	79.91	219
GE002838	mip	macrophage infectivity potentiator Mip	Mip	VF0153	VFG001864(gb|YP_094827)	7.16e-41	43.67	46.88	142
GE002842	llsG	ABC transporter ATP-binding protein LlsG	LLS	VF0410	VFG045332(gb|AHK25017)	5.62e-13	23.28	87.29	65
GE002849	hlyA	Hemolysin A	Hemolysin, HlyA	CVF792	VFG038900(gb|YP_857314)	2.23e-24	22.96	92.59	100
GE002859	rtxE	RTX toxin transporter, ATPase protein	The repeat in toxin (RTX)	CVF795	VFG038918(gb|YP_855893)	2.44e-83	35.75	97.96	275
GE002860	allS	DNA-binding transcriptional activator AllS	Allantion utilization	VF0572	VFG049114(gb|YP_002918199.1)	1.74e-08	27.34	89.63	51
GE002861	hlyB	hemolysin transport protein	Hemolysin	VF0207	VFG000841(gb|YP_325609)	1.17e-15	21.96	86.5	77
GE002862	hlyD	Hemolysin D	Hemolysin	VF0225	VFG000908(gb|NP_755449)	1.17e-10	27.85	41	59
GE002871	recN	DNA repair protein RecN	RecN	VF0457	VFG037118(gb|NP_273782)	######	40.89	99.82	352
GE002877	cylA	cytolysin activator	Cytolysin	VF0356	VFG002177(gb|AAM75253)	5.43e-09	24.46	36.39	55
GE002891	mtrE	multidrug efflux pump channel protein MtrE	MtrCDE	VF0451	VFG037010(gb|NP_274717)	1.74e-51	31.74	96.2	180
GE002892	cylG	3-ketoacyl-ACP-reductase CylG	Beta-hemolysin/cytolysin	CVF171	VFG005767(gb|NP_687682)	3.86e-24	31.34	81.48	95
GE002893	adeG	cation/multidrug efflux pump	AdeFGH efflux pump	VF0504	VFG037720(gb|YP_001847164)	0	61.26	99.53	1197
GE002894	adeF	membrane-fusion protein	AdeFGH efflux pump	VF0504	VFG037705(gb|YP_001847163)	1.11e-92	43.15	86.36	285
GE002897	ptxR	transcriptional regulator PtxR	pyoverdine	IA001	VFG044083(gb|NP_250948)	2.91e-29	32.41	84.01	112
GE002898	cadF	outer membrane fibronectin-binding protein	CadF	VF0322	VFG001931(gb|NP_282616)	9.82e-20	41.18	41.91	83
GE002902	phzH	phenazine-modifying enzyme	Phenazines biosynthesis	CVF536	VFG015551(gb|NP_248741)	1.67e-56	31.44	92.27	201
GE002906	clbF	colibactin biosynthesis dehydrogenase ClbF	Colibactin	VF0573	VFG049152(gb|YP_006635478.1)	1.1e-38	29.43	84.5	140
GE002921	msbA	lipid transporter ATP-binding/permease	LOS	CVF494	VFG013248(gb|NP_438233)	1.16e-50	33.93	53.12	183
GE002925	papX	PapX protein regulates flagellum synthesis to repress motility	P fimbriae	CVF425	VFG001713(gb|NP_755457)	5.05e-19	28.75	95.78	78
GE002930	iraB	Di/tripeptide permease	IraAB	VF0293	VFG001857(gb|YP_094782)	1.17e-13	26.12	79.08	70
GE002935	farB	fatty acid efflux system protein FarB	FarAB	VF0450	VFG036956(gb|NP_273368)	######	46.61	94.68	468
GE002936	farA	fatty acid efflux system protein FarA	FarAB	VF0450	VFG036938(gb|NP_273367)	3.6e-77	48.32	74.56	244
GE002937	adeH	outer membrane protein	AdeFGH efflux pump	VF0504	VFG037735(gb|YP_001847165)	1.16e-52	34.75	81.94	184
GE002938	papX	PapX protein regulates flagellum synthesis to repress motility	P fimbriae	CVF425	VFG001713(gb|NP_755457)	5.71e-09	31.78	63.95	49
GE002939	chpD	probable transcriptional regulator	Type IV pili	VF0082	VFG001234(gb|NP_249107)	2.59e-09	37.23	32.4	53
GE002943	pvdQ	3-oxo-C12-homoserine lactone acylase PvdQ	pyoverdine	IA001	VFG015950(gb|NP_251075)	4.88e-06	25.2	28.05	46
GE002944	fptA	Fe(III)-pyochelin receptor precursor	Pyochelin	VF0095	VFG000164(gb|NP_252911)	1.3e-28	25.31	95.37	119
GE002946	phzH	phenazine-modifying enzyme	Phenazines biosynthesis	CVF536	VFG015551(gb|NP_248741)	2.39e-34	31.75	59.75	134
GE002947	lidL	Dot/Icm type IV secretion system effector LidL	Dot/Icm	SS047	VFG010515(gb|YP_095205)	3.84e-13	29.02	74.83	66
GE002954	csuA/B	Csu pilus major pilin subunit CsuA/B	Csu fimbriae	VF0461	VFG037560(gb|YP_001847079)	4.19e-09	26.67	88.27	50
GE002955	csuC	Csu pilus chaperone protein CsuC	Csu fimbriae	VF0461	VFG037599(gb|YP_001847075)	2.25e-26	27.11	82.59	102
GE002956	csuD	Csu pilus usher protein CsuD	Csu fimbriae	VF0461	VFG037612(gb|YP_001847074)	1.34e-89	30.74	92.71	300
GE002957	csuB	Csu pilus subunit CsuB	Csu fimbriae	VF0461	VFG037586(gb|YP_001847076)	1.7e-09	27.7	38.95	53
GE002959	csuC	Csu pilus chaperone protein CsuC	Csu fimbriae	VF0461	VFG037599(gb|YP_001847075)	6.3e-14	26.7	87.73	65
GE002962	cdpA	cyclic di-GMP phosphodiesterase	CdpA	VF0432	VFG045467(gb|YP_107884)	9.44e-08	30.68	33.33	51
GE002965	cpsA	undecaprenyl diphosphate synthase	Capsule	VF0361	VFG002190(gb|NP_816141)	8.29e-65	43.1	89.72	203
GE002966	cpsB	phosphatidate cytidylyltransferase	Capsule	VF0361	VFG002189(gb|NP_816140)	6.78e-35	48.82	44.73	126
GE002968	mucP	metalloprotease protease	Alginate regulation	CVF523	VFG015000(gb|NP_252339)	######	47.29	95.98	345
GE002971	lpxD) UDP-3-O-(3-hydroxymyristoyl	glucosamine N-acyltransferase	LOS	CVF494	VFG013374(gb|NP_439075)	1.54e-92	43.41	98.22	280
GE002972	fabZ	(3R)-hydroxymyristoyl ACP dehydratase	LPS	CVF383	VFG011399(gb|NP_539749)	7.28e-36	45.71	89.54	122
GE002973	lpxA	UDP-N-acetylglucosamine acyltransferase	LOS	CVF494	VFG013390(gb|NP_439219)	3.79e-71	42.58	96.96	220
GE002974	lpxB	lipid-A-disaccharide synthase	LOS	CVF494	VFG013384(gb|NP_439218)	######	47.8	87.21	357
GE002997	Cj1435c	phosphatase	Capsule	VF0323	VFG001963(gb|NP_282576)	3.04e-14	26.94	92.86	65
GE003001	algU	alginate biosynthesis protein AlgZ/FimS	Alginate	VF0091	VFG000121(gb|NP_249453)	3.19e-16	29.89	94.12	70
GE003031	algU	alginate biosynthesis protein AlgZ/FimS	Alginate	VF0091	VFG000121(gb|NP_249453)	1.39e-16	27.01	77.62	72
GE003051	phzS	flavin dependent hydroxylase PhzS	Pyocyanin	VF0100	VFG000173(gb|NP_252907)	3.42e-08	23.31	78.96	51
GE003062	pilR	two-component response regulator PilR	Type IV pili	VF0082	VFG001214(gb|NP_253237)	1.66e-07	31.86	45.83	48
GE003069	mucD	serine protease MucD precursor	Alginate regulation	CVF523	VFG014950(gb|NP_249457)	######	48.43	89.9	384
GE003071	algU	alginate biosynthesis protein AlgZ/FimS	Alginate	VF0091	VFG000121(gb|NP_249453)	1.53e-84	62.57	90.29	249
GE003072	clbD	colibactin biosynthesis dehydrogenase ClbD	Colibactin	VF0573	VFG049150(gb|YP_006635476.1)	1.18e-23	28.67	39.71	99
GE003077	clbF	colibactin biosynthesis dehydrogenase ClbF	Colibactin	VF0573	VFG049152(gb|YP_006635478.1)	6.56e-40	28.49	86.77	144
GE003098	bapC	invasion protein	Bsa T3SS	VF0428	VFG002444(gb|YP_111532)	3.04e-30	44.09	66.32	109
GE003100	vscC	type III secretion system OM ring protein VscC	T3SS1	VF0408	VFG007174(gb|NP_798075)	7.23e-61	28.48	97.02	213
GE003101	vscT	type III secretion system C ring protein VscT	T3SS1	VF0408	VFG007164(gb|NP_798053)	1.9e-29	34.23	79.35	111
GE003103	bscN	ATP synthase in type III secretion system	TTSS	VF0035	VFG000048(gb|NP_880888)	######	58.71	94.12	491
GE003104	yscL	type III secretion system stator YscL	TTSS	VF0140	VFG000411(gb|NP_395195)	3.06e-09	24.42	72.53	52
GE003106	ascJ	type III secretion system OM ring protein AscJ	T3SS	VF0479	VFG038322(gb|YP_001144272)	9e-48	45.6	70.87	159
GE003109	ascU	Type III secretion system inner membrane export apparatus protein AscU	T3SS	VF0479	VFG038355(gb|YP_001144305)	3.79e-62	34.88	95.8	202
GE003110	bcrD	Type III secretion system LcrD homolog protein BcrD	TTSS	VF0035	VFG000064(gb|NP_880904)	0	45.76	97.81	561
GE003112	vscQ	type III secretion system cytoplasmic protein VscQ	T3SS1	VF0408	VFG007161(gb|NP_798050)	9.35e-10	27.87	53.73	56
GE003113	vscR	type III secretion system C-ring protein VscR	T3SS1	VF0408	VFG007162(gb|NP_798051)	4.52e-76	52.34	99.07	229
GE003114	yscS	type III secretion system minor export apparatus protein YscS	TTSS	VF0140	VFG000395(gb|NP_395179)	1.11e-14	38.27	93.02	62
GE003126	Cj1437c	aminotransferase	Capsule	VF0323	VFG001965(gb|NP_282578)	3.18e-11	24.76	55.35	61
GE003127	flmH	short chain dehydrogenase/reductase family oxidoreductase	Polar flagella	CVF786	VFG038839(gb|YP_858598)	1.21e-16	30.59	95.44	73
GE003128	pvdN	pyoverdine biosynthesis protein PvdN	pyoverdine	IA001	VFG015994(gb|NP_251084)	1.94e-17	25.38	58.37	80
GE003136	katA	catalase/(hydro)peroxidase	KatAB	VF0168	VFG001861(gb|YP_094248)	0	61.67	98.66	948
GE003138	clbM	precolibactin export MATE transporter ClbM	Colibactin	VF0573	VFG049159(gb|YP_006635485.1)	1.45e-08	22.78	61.91	53
GE003147	flhF	flagellar biosynthesis regulator FlhF	Flagella	VF0114	VFG001895(gb|NP_281279)	2.75e-12	28.86	42.36	65
GE003151	ptxR	transcriptional regulator PtxR	pyoverdine	IA001	VFG044083(gb|NP_250948)	3.73e-20	27.48	88.96	86
GE003154	cheY	chemotaxis protein CheY	ND	AI144	VFG038698(gb|YP_855922)	9.37e-10	33.04	87.5	50
GE003155	fleS/flrB	flagellar sensor histidine kinase FleS	polar flagella	AI149	VFG043346(gb|YP_095789)	4.31e-14	26.37	61.31	70
GE003156	bfmS	signal transduction histidine kinase	BfmRS	VF0463	VFG038234(gb|YP_001845365)	2.09e-21	31.11	21.13	96
GE003157	cheR	chemotaxis protein methyltransferase	Flagella	VF0430	VFG002528(gb|YP_109899)	2.8e-15	26.09	72.26	71
GE003158	cheB	chemotaxis-specific methylesterase CheB	peritrichous flagella	AI145	VFG043207(gb|YP_001006775)	7.63e-24	33.86	94.87	94
GE003159	cheA	chemotaxis histidine kinase	Pse5Ac7Ac, Pse5Ac7Am, Pse8OAc, Pse5Am7AcGlnAc	AI151	VFG043394(gb|YP_002343725)	1.06e-15	32	32.09	75
GE003162	fyuA	yersiniabactin receptor FyuA	Ybt	VF0564	VFG044333(gb|YP_002920253)	6.52e-19	24.03	69.07	88
GE003164	pilS	two-component sensor PilS	Type IV pili	VF0082	VFG001213(gb|NP_253236)	8.86e-20	31.11	33.07	90
GE003165	phoR	Possible two component system response sensor kinase membrane associated PhoR	PhoP/R	CVF331	VFG009810(gb|NP_215272)	9.48e-20	28.74	81.51	85
GE003175	bfmR	biofilm-controlling response regulator	BfmRS	VF0463	VFG038219(gb|YP_001845364)	1.39e-11	25.23	83.91	59
GE003185	lspA	signal peptidase II	Lsp	VF0351	VFG002161(gb|NP_465369)	1.84e-22	32.26	92.22	87
GE003193	msbA	lipid transporter ATP-binding/permease	LOS	CVF494	VFG013248(gb|NP_438233)	8.61e-07	33.05	11.34	49
GE003198	algU	alginate biosynthesis protein AlgZ/FimS	Alginate	VF0091	VFG000121(gb|NP_249453)	8.16e-12	27.11	40	60
GE003215	bprB	two-component response regulator	Bsa T3SS	VF0428	VFG002440(gb|YP_111528)	1.09e-21	31.43	97.18	87
GE003219	flhG	ATP-binding protein	Flagella	CVF397	VFG011850(gb|NP_281278)	7.63e-18	32.47	56.13	78
GE003222	bfmS	signal transduction histidine kinase	BfmRS	VF0463	VFG038234(gb|YP_001845365)	1.81e-12	26.85	65.81	65
GE003223	phoP	Possible two component system response transcriptional positive regulator PhoP	PhoP	VF0286	VFG001386(gb|NP_215271)	2.73e-35	38.29	90.79	125
GE003226	eptC	phosphoethanolamine transferase	Pse5Ac7Ac, Pse5Ac7Am, Pse8OAc, Pse5Am7AcGlnAc	AI151	VFG043392(gb|YP_002343698)	2.55e-91	32.53	95.83	290
GE003230	lbtC	LbtC inner membrane protein required for import of Legiobactin	Legiobactin	VF0291	VFG045330(gb|YP_095353)	1.95e-21	25.42	85.37	92
GE003234	katA	catalase	KatA	VF0454	VFG037028(gb|NP_273273)	######	43.7	68.76	390
GE003235	chpD	probable transcriptional regulator	Type IV pili	VF0082	VFG001234(gb|NP_249107)	7.57e-12	36.26	37.34	60
GE003258	relA) Probable GTP pyrophosphokinase RelA (ATP:GTP 3'-pyrophosphotransferase) (PPGPP synthetase I) ((P)PPGPP synthetase	(GTP diphosphokinase)	RelA	VF0287	VFG001826(gb|NP_217099)	8.43e-10	31.45	52.12	55
GE003259	cdpA	cyclic di-GMP phosphodiesterase	CdpA	VF0432	VFG045467(gb|YP_107884)	5.76e-19	27.8	85.48	83
GE003263	wcbP	capsular polysaccharide biosynthesis dehydrogenase/reductase	Capsule I	VF0436	VFG002550(gb|YP_109386)	5.44e-17	30.81	57.19	76
GE003266	flmH	short chain dehydrogenase/reductase family oxidoreductase	Polar flagella	CVF786	VFG038839(gb|YP_858598)	6.11e-29	33.86	82	110
GE003290	pilH	twitching motility protein PilH	Type IV pili	VF0082	VFG001226(gb|NP_249100)	1.82e-44	55.46	92.19	141
GE003292	hspX) Heat shock protein HspX (alpha-crystallin homolog) (14 kDa antigen	(HSP16.3)	HspX	VF0301	VFG001397(gb|NP_216547)	1.43e-08	32.22	55.7	47
GE003302	fyuA	yersiniabactin receptor FyuA	Ybt	VF0564	VFG044333(gb|YP_002920253)	9.99e-09	31.54	19.78	55
GE003308	icl) Isocitrate lyase Icl (isocitrase	(isocitratase)	Isocitrate lyase	VF0253	VFG001381(gb|YP_177728)	9.91e-16	28.23	75.17	73
GE003309	fleQ	transcriptional regulator FleQ	polar flagella	AI149	VFG043319(gb|YP_094888)	2.03e-67	39.66	62.66	225
GE003314	pilZ	type IV pilus biogenesis protein PilZ	type IV pili	AI111	VFG042867(gb|YP_095430)	9.35e-28	43.86	96.58	98
GE003317	ybtS	yersiniabactin biosynthesis salicylate synthase YbtS	Ybt	VF0564	VFG044323(gb|YP_002920243)	1.94e-32	33.46	56.1	125
GE003318	cylI	putative 3-ketoacyl-ACP synthase CylI	Beta-hemolysin/cytolysin	CVF171	VFG005788(gb|NP_687689)	8.35e-34	27.57	96.84	131
GE003319	acpXL	acyl carrier protein	LPS	CVF383	VFG011430(gb|NP_540392)	2.13e-27	65.75	91.14	94
GE003320	cylG	3-ketoacyl-ACP-reductase CylG	Beta-hemolysin/cytolysin	CVF171	VFG005767(gb|NP_687682)	2.06e-59	42.98	95.55	188
GE003321	clbG	colibactin biosynthesis acyltransferase ClbG	Colibactin	VF0573	VFG049153(gb|YP_006635479.1)	4.29e-32	34.38	88.54	121
GE003345	kdkA	3-deoxy-D-manno-octulosonic-acid kinase	LOS	CVF494	VFG013271(gb|NP_438429)	3.8e-34	34.35	87.95	122
GE003346	opsX/rfaC	heptosyltransferase I	LOS	CVF494	VFG013276(gb|NP_438430)	8.14e-86	38.3	97.99	264
GE003348	pppA	Pseudomonas protein phosphatase PppA	HSI-I	VF0334	VFG002061(gb|NP_248765)	7.29e-44	39.66	96.15	147
GE003354	prsA2	post translocation chaperone PrsA2	PrsA2	VF0449	VFG032878(gb|NP_465743)	3.51e-13	32.39	25.15	67
GE003358	clpP	ATP-dependent Clp protease proteolytic subunit	ClpP	VF0074	VFG000077(gb|NP_465991)	1.47e-91	64.74	90.87	268
GE003365	phoP	Possible two component system response transcriptional positive regulator PhoP	PhoP	VF0286	VFG001386(gb|NP_215271)	7.02e-38	32.75	96.51	132
GE003366	phoR	Possible two component system response sensor kinase membrane associated PhoR	PhoP/R	CVF331	VFG009810(gb|NP_215272)	1.4e-31	39.15	47.29	122
GE003371	lpxH	UDP-2,3-diacylglucosamine pyrophosphohydrolase	LOS	CVF494	VFG013321(gb|NP_438894)	1.35e-62	42.02	95.55	196
GE003377	p97	protein p97; cilium adhesin	P97/P102 paralog family	VF0426	VFG016463(gb|YP_115696)	1.47e-15	42.34	30.99	75
GE003382	plcH	hemolytic phospholipase C precursor	PLC	VF0092	VFG000157(gb|NP_249535)	######	41.54	98.56	502
GE003386	fbpC) iron(III	ABC transporter, ATP-binding protein	FbpABC	VF0272	VFG001206(gb|NP_273675)	2.06e-61	41.7	80.76	200
GE003387	fbpB) iron(III	ABC transporter, permease protein	FbpABC	VF0272	VFG000249(gb|NP_273676)	5.39e-07	23.86	82.97	47
GE003388	fbpB) iron(III	ABC transporter, permease protein	FbpABC	VF0272	VFG000249(gb|NP_273676)	1e-09	26.54	71.48	55
GE003390	wcbT	acyl-CoA transferase	Capsule I	VF0436	VFG002546(gb|YP_109382)	2.16e-50	32.95	86.82	175
GE003394	cadF	outer membrane fibronectin-binding protein	CadF	VF0322	VFG001931(gb|NP_282616)	2.47e-20	29.07	61.64	87
GE003395	clbB	colibactin hybrid non-ribosomal peptide synthetase/type I polyketide synthase ClbB	Colibactin	VF0573	VFG049148(gb|YP_006635474.1)	2.22e-13	32.41	42.35	68
GE003404	lirB	Dot/Icm type IV secretion system effector LirB	Dot/Icm	SS047	VFG041304(gb|YP_095978)	9.74e-46	55.17	78.66	148
GE003407	clbL	colibactin biosynthesis amidase ClbL	Colibactin	VF0573	VFG049158(gb|YP_006635484.1)	3.73e-25	31.92	45.57	105
GE003409	phzC1	phenazine biosynthesis protein PhzC	Phenazines biosynthesis	CVF536	VFG015509(gb|NP_252901)	1.26e-77	37.82	92.87	248
GE003460	hmw2C	glycosyltransferase	HMW1/HMW2	VF0038	VFG001156(gb|AAA20526)	2.73e-06	24.6	40.32	46
GE003466	brkB	serum resistance protein	Brk	VF0034	VFG000028(gb|NP_882012)	3.32e-08	24.6	55.29	51
GE003474	mycP3	Type VII secretion system membrane-anchored mycosin MycP3	ESX-3	VF0521	VFG022146(gb|NP_214805)	1.8e-12	31.31	50.09	66
GE003475	mycP1	ESX-1 type VII secretion system subtilisin-like serine protease MycP1	ESX-1	VF0315	VFG002391(gb|NP_218400)	1.05e-07	33.06	83.22	46
GE003477	mycP3	Type VII secretion system membrane-anchored mycosin MycP3	ESX-3	VF0521	VFG022146(gb|NP_214805)	6.09e-12	28.3	55	64
GE003496	allS	DNA-binding transcriptional activator AllS	Allantion utilization	VF0572	VFG049114(gb|YP_002918199.1)	2.95e-10	25.7	86.26	57
GE003500	msrA/B(pilB)	trifunctional thioredoxin/methionine sulfoxide reductase A/B protein	MsrAB	VF0456	VFG037100(gb|NP_273110)	3.93e-31	40.74	73.61	117
GE003502	bprB	two-component response regulator	Bsa T3SS	VF0428	VFG002440(gb|YP_111528)	2.3e-08	40.32	25.96	50
GE003503	phoR	Possible two component system response sensor kinase membrane associated PhoR	PhoP/R	CVF331	VFG009810(gb|NP_215272)	2.81e-18	30.22	38.68	85
GE003504	pilH	twitching motility protein PilH	Type IV pili	VF0082	VFG001226(gb|NP_249100)	3.88e-14	33.9	75.97	63
GE003508	exsA	Type III secretion system transcriptional regulator	T3SS	VF0479	VFG038332(gb|YP_001144282)	1.66e-08	26.92	51.82	51
GE003514	bplA	probable oxidoreductase	LPS	VF0033	VFG000038(gb|NP_878995)	4.57e-09	22.33	73.71	54
GE003515	CBU_1789	Coxiella Dot/Icm type IVB secretion system translocated effector	T4SS effectors	CVF803	VFG039623(gb|NP_820769)	1.06e-14	26.15	61.67	69
GE003516	lpg1083	Dot/Icm type IV secretion system effector	Dot/Icm	VF0156	VFG045506(gb|YP_095116)	2.43e-06	22.7	62.92	44
GE003522	ybtE	yersiniabactin biosynthesis salycil-AMP ligase YbtE	Ybt	VF0564	VFG044332(gb|YP_002920252)	1.82e-38	28.84	92.45	144
GE003531	phzS	flavin dependent hydroxylase PhzS	Pyocyanin	VF0100	VFG000173(gb|NP_252907)	2.19e-08	26.22	79.81	52
GE003536	prsA2	post translocation chaperone PrsA2	PrsA2	VF0449	VFG032878(gb|NP_465743)	9.6e-07	29.29	28.08	47
GE003537	pdxA	4-hydroxythreonine-4-phosphate dehydrogenase	Pse5Ac7Ac	AI150	VFG043391(gb|NP_208374)	9e-32	34.11	65.53	119
GE003549	bfmS	signal transduction histidine kinase	BfmRS	VF0463	VFG038234(gb|YP_001845365)	1.09e-18	28.91	54.61	85
GE003550	phoP	Possible two component system response transcriptional positive regulator PhoP	PhoP	VF0286	VFG001386(gb|NP_215271)	3.22e-39	38.91	91.14	135
GE003552	fbpC) iron(III	ABC transporter, ATP-binding protein	FbpABC	VF0272	VFG001206(gb|NP_273675)	4.53e-29	39.55	86	109
GE003556	hitC) iron(III	ABC transporter, ATP-binding protein	HitABC	VF0268	VFG000344(gb|NP_438273)	3.81e-35	36.11	74.55	128
GE003561	hpuB	haemoglobin-haptoglobin-utilization protein	HpuAB	VF0049	VFG000268(gb|NP_283297)	1.58e-43	25.51	94.08	165
GE003571	ompA	outer membrane protein A	OmpA	VF0236	VFG001443(gb|AAF37887)	1.51e-14	38.71	28.04	71
GE003588	clbB	colibactin hybrid non-ribosomal peptide synthetase/type I polyketide synthase ClbB	Colibactin	VF0573	VFG049148(gb|YP_006635474.1)	3.61e-25	33	88.92	104
GE003599	lpxC	UDP-3-O-(R-3-hydroxymyristoyl)-N-acetylglucosamine deacetylase	LOS	CVF494	VFG013412(gb|NP_439302)	######	58.94	99.01	375
GE003607	wbpL	undecaprenyl-phosphate alpha-N-acetylglucosaminyltransferase	LPS	CVF383	VFG011519(gb|NP_540343)	3.17e-06	25.45	28.53	45
GE003623	phoP	Possible two component system response transcriptional positive regulator PhoP	PhoP	VF0286	VFG001386(gb|NP_215271)	9.56e-35	35.37	94.12	124
GE003624	phoR	Possible two component system response sensor kinase membrane associated PhoR	PhoP/R	CVF331	VFG009810(gb|NP_215272)	6.4e-17	29.82	25.17	81
GE003626	mgtB	Mg2+ transport protein	MgtBC	VF0106	VFG000574(gb|NP_462662)	5.48e-21	25.16	73.46	94
GE003641	bauE	ferric siderophore ABC transporter, ATP-binding protein BauE	Acinetobactin	VF0467	VFG037386(gb|YP_001847242)	4.43e-18	26.91	35.44	81
GE003653	kfoC	glycosyltransferase family 2 protein	LPS	VF0561	VFG049029(gb|YP_002920342.1)	1.15e-07	23.58	37.28	49
GE003656	bauA	TonB-dependent siderophore receptor BauA	Acinetobactin	VF0467	VFG037358(gb|YP_001847240)	2.48e-43	23.68	96.4	164
GE003660	lspD	general secretion pathway protein D	<i>lsp</i> T2SS	VF0154	VFG001877(gb|YP_095350)	1.63e-32	25.11	87.95	131
GE003663	pilN	type IV pilus inner membrane platform protein PilN	Type IV pili	VF0082	VFG001221(gb|NP_253730)	6.31e-09	27.32	47.45	52
GE003664	gspK	general secretion pathway protein K	T2SS	VF0333	VFG002054(gb|YP_404607)	2.97e-08	29.82	36.4	50
GE003666	xcpV	general secretion pathway protein I	xcp secretion system	VF0084	VFG000178(gb|NP_251789)	1.13e-06	37.35	56.52	41
GE003668	xcpT	general secretion pathway protein G	xcp secretion system	VF0084	VFG000180(gb|NP_251791)	7.83e-23	36.88	93.01	87
GE003669	pilC	still frameshift type 4 fimbrial biogenesis protein PilC	Type IV pili	VF0082	VFG000113(gb|NP_253217)	7.35e-68	33.07	93.09	220
GE003670	xcpR	general secretion pathway protein E	xcp secretion system	VF0084	VFG000182(gb|NP_251793)	######	50.25	69.57	379
GE003671	cylA	cytolysin activator	Cytolysin	VF0356	VFG002177(gb|AAM75253)	1.54e-16	25.85	43.7	78
GE003672	boaB	autotransporter protein	BoaB	VF0435	VFG002437(gb|YP_108306)	1.11e-22	34.18	18.67	103
GE003675	fimB	Type 1 fimbriae Regulatory protein fimB	Type 1 fimbriae	VF0221	VFG000871(gb|NP_757239)	5.7e-17	30.46	53.56	75
GE003690	coxH2	Coxiella Dot/Icm type IVB secretion system translocated effector	Dot/Icm	SS051	VFG039386(gb|NP_819821)	8.45e-34	40.56	90.45	116
GE003691	pspA	pneumococcal surface protein A	PspA	VF0152	VFG001361(gb|NP_344663)	1.69e-06	40.98	38.06	43
GE003695	bprA	HNS-like regulatory protein	Bsa T3SS	VF0428	VFG002448(gb|YP_111536)	2.98e-07	45.28	33.55	43
GE003698	hitC) iron(III	ABC transporter, ATP-binding protein	HitABC	VF0268	VFG000344(gb|NP_438273)	3.41e-27	32.27	78.62	106
GE003706	manB	phosphomannomutase	O-antigen	VF0392	VFG002362(gb|YP_001007254)	######	55.95	99.11	513
GE003707	algA	phosphomannose isomerase / guanosine 5'-diphospho-D-mannose pyrophosphorylase	Alginate	VF0091	VFG000133(gb|NP_252241)	0	59.49	99.14	584
GE003709	wbcA	sugar epimerase	O-antigen	VF0392	VFG002375(gb|YP_001007267)	7.29e-36	36.36	89.07	123
GE003710	galF	UTP-glucose-1-phosphate uridylyltransferase subunit GalF	Capsule	VF0560	VFG048990(gb|YP_002920369.1)	5.13e-16	26.03	68.14	73
GE003711	rffG	dTDP-glucose 46-dehydratase	LOS	CVF494	VFG013368(gb|NP_439034)	######	54.52	93.16	381
GE003714	bplC	lipopolysaccharide biosynthesis protein	LPS	VF0033	VFG000036(gb|NP_878993)	2.9e-60	35.39	95.1	198
GE003715	gtrB	bactoprenol glucosyl transferase	LPS	VF0124	VFG000670(gb|NP_706258)	9.5e-30	27.42	93.5	114
GE003716	bplB	probable acetyltransferase	LPS	VF0033	VFG000037(gb|NP_878994)	1.54e-34	42.76	48.22	124
GE003719	gmd	GDP-D-mannose dehydratase	Capsule	VF0560	VFG048885(gb|YP_002920358.1)	1.3e-19	26.65	94.55	85
GE003720	gmd	GDP-mannose 4,6-dehydratase	O-antigen	VF0392	VFG002365(gb|YP_001007257)	######	52.68	98.55	383
GE003722	wcbH	glycosyl transferase	Capsule I	VF0436	VFG002559(gb|YP_109395)	1.22e-15	27.4	44.77	77
GE003723	wbkA	mannosyltransferase	LPS	VF0367	VFG002224(gb|NP_540321)	9.27e-07	26.26	46.18	46
GE003725	wzt	lipopolysaccharide O-antigen ABC transport system ATP-binding component	LPS	VF0561	VFG049084(gb|YP_002920347.1)	7.33e-59	44	46.5	193
GE003726	wzm	lipopolysaccharide O-antigen ABC transport system transmembrane component	LPS	VF0561	VFG049095(gb|YP_002920348.1)	9.74e-26	26	92.78	100
GE003733	tapW	twitching ATPase	Tap type IV pili	CVF783	VFG038471(gb|YP_857247)	######	55.71	92.57	402
GE003745	cylI	putative 3-ketoacyl-ACP synthase CylI	Beta-hemolysin/cytolysin	CVF171	VFG005788(gb|NP_687689)	2.69e-29	27.6	98.01	117
GE003756	phzH	phenazine-modifying enzyme	Phenazines biosynthesis	CVF536	VFG015551(gb|NP_248741)	9.06e-07	32.99	15.27	48
GE003758	tagT	type six secretion associated protein TagT, ATP-binding component of ABC transporter	HSI-I	VF0334	VFG002059(gb|NP_248763)	5.15e-30	40.91	78.24	111
GE003762	fleR/flrC	transcriptional activator	ND	AI144	VFG038755(gb|YP_857328)	3.42e-90	42.56	83.67	281
GE003763	pilS	two-component sensor PilS	Type IV pili	VF0082	VFG001213(gb|NP_253236)	1.92e-18	28.16	43.11	84
GE003765	wcbM	D-glycero-d-manno-heptose 1-phosphate guanosyltransferase	Capsule I	VF0436	VFG002553(gb|YP_109389)	2.1e-07	23.18	48.24	48
GE003769	ascN	Type III secretion system ATPase	T3SS	VF0479	VFG038348(gb|YP_001144298)	2.22e-45	31.3	75.85	163
GE003771	bscN	ATP synthase in type III secretion system	TTSS	VF0035	VFG000048(gb|NP_880888)	1.94e-39	28.23	79.03	147
GE003788	IlpA	immunogenic lipoprotein A	IlpA	VF0513	VFG045346(gb|NP_933683)	1.75e-56	39.63	98.5	182
GE003790	hitC) iron(III	ABC transporter, ATP-binding protein	HitABC	VF0268	VFG000344(gb|NP_438273)	1.52e-34	30.36	66.57	128
GE003795	iroN	salmochelin receptor IroN	IroN	VF0230	VFG000935(gb|NP_753164)	4.66e-12	32.43	15.92	66
GE003796	cylG	3-ketoacyl-ACP-reductase CylG	Beta-hemolysin/cytolysin	CVF171	VFG005767(gb|NP_687682)	2.67e-28	29.6	90.67	107
GE003803	phoR	Possible two component system response sensor kinase membrane associated PhoR	PhoP/R	CVF331	VFG009810(gb|NP_215272)	8.86e-25	39.09	36.63	105
GE003811	msrA/B(pilB)	trifunctional thioredoxin/methionine sulfoxide reductase A/B protein	MsrAB	VF0456	VFG037100(gb|NP_273110)	4.92e-23	43.65	80.52	92
GE003813	motA	flagellar motor protein MotA	Flagella	VF0430	VFG002534(gb|YP_109905)	8.24e-94	47.54	99.65	280
GE003814	motB	flagellar motor protein MotB	peritrichous flagella	AI145	VFG043212(gb|YP_001006781)	1.3e-75	38.29	88.55	241
GE003820	hitC) iron(III	ABC transporter, ATP-binding protein	HitABC	VF0268	VFG000344(gb|NP_438273)	1.02e-26	30.13	69.75	105
GE003827	ptxR	transcriptional regulator PtxR	pyoverdine	IA001	VFG044083(gb|NP_250948)	2.79e-38	36	96.14	137
GE003830	pgaC	poly-beta-1,6 N-acetyl-D-glucosamine synthase	PNAG	VF0472	VFG037678(gb|YP_001847021)	9.34e-06	26.45	47.62	42
GE003836	algR	alginate biosynthesis regulatory protein AlgR	Alginate	VF0091	VFG000119(gb|NP_253948)	2.74e-36	33.6	94.96	129
GE003837	algZ	sigma factor AlgU	Alginate	VF0091	VFG000120(gb|NP_253949)	1.34e-19	34.29	39.09	86
GE003840	entB	isochorismatase	Enterobactin	VF0228	VFG000933(gb|NP_752613)	3.85e-08	33.58	72.68	48
GE003846	cheR	chemotaxis protein methyltransferase	Flagella	VF0430	VFG002528(gb|YP_109899)	4.39e-25	33.92	18.18	105
GE003849	pilR	two-component response regulator PilR	Type IV pili	VF0082	VFG001214(gb|NP_253237)	1.32e-73	36.04	98.59	238
GE003855	flmH	short chain dehydrogenase/reductase family oxidoreductase	Polar flagella	CVF786	VFG038839(gb|YP_858598)	3.33e-31	34.39	85.07	115
GE003856	galE	UDP-glucose 4-epimerase	LOS	CVF494	VFG013286(gb|NP_438515)	######	51.78	86.95	351
GE003858	glf	UDP-galactopyranose mutase	LPS	VF0561	VFG049062(gb|YP_002920345.1)	1.29e-91	42.9	88.19	281
GE003860	hlyB	hemolysin transport protein	Hemolysin	VF0207	VFG000841(gb|YP_325609)	1.17e-70	35.62	82.46	241
GE003872	motD	flagellar motor protein	Deoxyhexose linking sugar, 209 Da capping structure	AI138	VFG014720(gb|NP_250152)	2.1e-15	37.8	54.88	70
GE003874	fptA	Fe(III)-pyochelin receptor precursor	Pyochelin	VF0095	VFG000164(gb|NP_252911)	4.94e-34	27.25	92.42	135
GE003877	fbpC) iron(III	ABC transporter, ATP-binding protein	FbpABC	VF0272	VFG001206(gb|NP_273675)	3.2e-20	29.15	85.77	85
GE003879	ptxR	transcriptional regulator PtxR	pyoverdine	IA001	VFG044083(gb|NP_250948)	9.78e-30	30.66	92.86	113
GE003881	entA	2,3-dihydroxybenzoate-2,3-dehydrogenase	Ent	VF0562	VFG048409(gb|YP_002918380.1)	3.91e-13	30.11	61.67	65
GE003885	ptxR	transcriptional regulator PtxR	pyoverdine	IA001	VFG044083(gb|NP_250948)	3.16e-06	29.33	48.05	44
GE003894	fliA	flagellar biosynthesis sigma factor	Flagella	VF0394	VFG002319(gb|YP_001006726)	6.77e-13	24.52	31.41	65
GE003896	htrB	lipid A biosynthesis lauroyl acyltransferase	LOS	VF0326	VFG002025(gb|NP_282282)	6.33e-21	22.58	84.36	87
GE003902	lgtF	beta-1,4-glucosyltransferase	LOS	CVF494	VFG013315(gb|NP_438813)	1.05e-38	37.1	88.69	135
GE003906	wbkC	GDP-mannose 4,6-dehydratase / GDP-4-amino-4,6-dideoxy-D-mannose formyltransferase	LPS	VF0367	VFG002230(gb|NP_540335)	2.22e-14	34.07	29.32	68
GE003911	pilE	type IV pilus pilin PilE	type IV pili	AI111	VFG010455(gb|YP_095931)	3.57e-11	28.87	54.07	56
GE003917	cdpA	cyclic di-GMP phosphodiesterase	CdpA	VF0432	VFG045467(gb|YP_107884)	8.6e-07	31.11	38.72	48
GE003918	flmH	short chain dehydrogenase/reductase family oxidoreductase	Polar flagella	CVF786	VFG038839(gb|YP_858598)	4.67e-37	36.36	94.96	130
GE003930	fliA	flagellar biosynthesis sigma factor	Flagella	VF0394	VFG002319(gb|YP_001006726)	8e-09	24.23	77.32	52
GE003932	cheY	chemotaxis regulatory protein CheY	peritrichous flagella	AI145	VFG043206(gb|YP_001006774)	9.37e-08	26.6	31.07	47
GE003934	fbpC) iron(III	ABC transporter, ATP-binding protein	FbpABC	VF0272	VFG001206(gb|NP_273675)	1.2e-30	33.65	90.35	114
GE003937	ssaN	type III secretion system ATPase SsaN	TTSS(SPI-2 encode)	VF0321	VFG000515(gb|NP_460380)	1.67e-18	30.36	37.52	85
GE003947	adeF	membrane-fusion protein	AdeFGH efflux pump	VF0504	VFG037705(gb|YP_001847163)	1.41e-37	29.34	81.8	139
GE003948	acrB	acriflavine resistance protein B	AcrAB	VF0568	VFG049144(gb|YP_002918165.1)	######	28.52	95.75	354
GE003949	acrB	acriflavine resistance protein B	AcrAB	VF0568	VFG049144(gb|YP_002918165.1)	######	29.19	94.65	365
GE003965	vgrG-3	type VI secretion system effector VgrG-3 protein, lysozyme-like activity, VgrG-3 and TsaB are a toxin-antitoxin complex	T6SS	VF0335	VFG002091(gb|NP_232524)	1.46e-31	37.36	91.49	119
GE003969	iap/cwhA	P60 extracellular protein, invasion associated protein Iap	p60	VF0068	VFG000070(gb|NP_464110)	8.62e-06	30.3	19.62	44
GE003981	CBU_1594	Coxiella Dot/Icm type IVB secretion system translocated effector	T4SS effectors	CVF803	VFG039549(gb|NP_820577)	1.11e-49	53.42	97.97	157
GE003982	brkB	serum resistance protein	Brk	VF0034	VFG000028(gb|NP_882012)	1.05e-31	32.95	79.37	119
GE004009	AHA_1389	CobQ/CobB/MinD/ParA family protein	Polar flagella	CVF786	VFG038722(gb|YP_855928)	1.01e-40	36.18	89.43	141
GE004013	tviC	Vi polysaccharide biosynthesis protein, epimerase TviC	Vi antigen	VF0101	VFG000430(gb|NP_458739)	2.31e-37	31.61	95.95	135
GE004014	gtrB	bactoprenol glucosyl transferase	LPS	VF0124	VFG000670(gb|NP_706258)	4.47e-14	25.78	89.17	67
GE004017	algC	phosphomannomutase AlgC	Alginate biosynthesis	CVF522	VFG014893(gb|NP_254009)	0	57.05	58.85	534
GE004024	cylG	3-ketoacyl-ACP-reductase CylG	Beta-hemolysin/cytolysin	CVF171	VFG005767(gb|NP_687682)	2.68e-20	28.19	73.31	84
GE004025	oatA	peptidoglycan O-acetyltransferase	OatA	VF0441	VFG032992(gb|NP_464816)	8.74e-17	30.34	57.75	78
GE004026	rhlB	rhamnosyltransferase chain B	Rhamnolipid	VF0089	VFG000155(gb|NP_252168)	6.33e-19	28.29	77.25	85
GE004027	entF	enterobactin synthase subunit F	Ent	VF0562	VFG048498(gb|YP_002918370.1)	######	35.17	84.86	454
GE004028	pvdL	peptide synthase PvdL	pyoverdine	IA001	VFG016058(gb|NP_251114)	1.53e-22	27.76	90.57	96
GE004038	cdpA	cyclic di-GMP phosphodiesterase	CdpA	VF0432	VFG045467(gb|YP_107884)	1.43e-45	41.3	46.44	166
GE004055	bfmR	biofilm-controlling response regulator	BfmRS	VF0463	VFG038219(gb|YP_001845364)	1.71e-31	33.48	96.83	114
GE004056	bfmS	signal transduction histidine kinase	BfmRS	VF0463	VFG038234(gb|YP_001845365)	6.31e-25	27.06	73.13	103
GE004060	mucD	serine protease MucD precursor	Alginate regulation	CVF523	VFG014950(gb|NP_249457)	6.06e-79	38.91	88.08	254
GE004067	katA	catalase	KatA	VF0454	VFG037028(gb|NP_273273)	3.33e-14	24.75	76.03	70
GE004070	rcsB	transcriptional regulator RcsB	RcsAB	VF0571	VFG049018(gb|YP_002920501.1)	7.92e-17	29.08	93	73
GE004072	adeF	membrane-fusion protein	AdeFGH efflux pump	VF0504	VFG037705(gb|YP_001847163)	1.68e-14	26.11	84.95	71
GE004073	hitC) iron(III	ABC transporter, ATP-binding protein	HitABC	VF0268	VFG000344(gb|NP_438273)	1.25e-33	34.5	98.25	122
GE004097	exsA	Type III secretion system transcriptional regulator	T3SS	VF0479	VFG038332(gb|YP_001144282)	1.68e-11	25.33	48.53	60
GE004107	phoR	Possible two component system response sensor kinase membrane associated PhoR	PhoP/R	CVF331	VFG009810(gb|NP_215272)	1.92e-16	26.65	82.17	78
GE004108	phoP	Possible two component system response transcriptional positive regulator PhoP	PhoP	VF0286	VFG001386(gb|NP_215271)	2.02e-47	39.21	97.8	157
GE004112	ankY/legA9	Dot/Icm type IV secretion system effector LegA9/AnkY, ankyrin repeat-containing protein targeting the LCV for autophagy uptake	Dot/Icm	SS047	VFG041248(gb|YP_094446)	9.15e-06	35.06	38.74	42
GE004113	katA	catalase	KatA	VF0454	VFG037028(gb|NP_273273)	######	42.55	92.42	379
GE004127	iroN	salmochelin receptor IroN	IroN	VF0230	VFG000935(gb|NP_753164)	3.44e-08	28.25	15.75	54
GE004133	cylA) ABC (ATP-binding cassette	transporter CylA	Beta-hemolysin/cytolysin	CVF171	VFG005776(gb|NP_687685)	1.14e-25	31.02	84.27	100
GE004135	cylR2	cytolysin regulator R2	Cytolysin	VF0356	VFG045470(gb|AAM75247)	2.57e-12	44.83	86.36	54
GE004143	cylA) ABC (ATP-binding cassette	transporter CylA	Beta-hemolysin/cytolysin	CVF171	VFG005776(gb|NP_687685)	2.83e-23	33.02	62.35	95
GE004162	ankB	Coxiella Dot/Icm type IVB secretion system translocated effector, ankyrin repeat-containing protein	T4SS effectors	CVF803	VFG039262(gb|YP_001596115)	1.34e-12	27.74	25.75	67
GE004164	cylI	putative 3-ketoacyl-ACP synthase CylI	Beta-hemolysin/cytolysin	CVF171	VFG005788(gb|NP_687689)	6.22e-42	29.8	97.99	154
GE004166	pgaC	poly-beta-1,6 N-acetyl-D-glucosamine synthase	PNAG	VF0472	VFG037678(gb|YP_001847021)	1.66e-06	26.72	43.96	45
GE004170	cylG	3-ketoacyl-ACP-reductase CylG	Beta-hemolysin/cytolysin	CVF171	VFG005767(gb|NP_687682)	4.03e-46	36.13	95.51	154
GE004179	acpC	acyl carrier protein AcpC	Beta-hemolysin/cytolysin	CVF171	VFG005770(gb|NP_687683)	5.73e-10	41.56	85.39	49
GE004182	clbN	colibactin non-ribosomal peptide synthetase ClbN	Colibactin	VF0573	VFG049160(gb|YP_006635486.1)	5.34e-08	21.98	69.73	52

## Sheet: VFDB.Virulence_Factors.gene_lis
Supplementaty Table 7.Prediction results of virulence factors in the GSXT20191014 genome.
Virulence_factor_id	vf_name	vf_full_name	species_name	vf_function	vf_Mechanism	vf_Keyword	gene_list
VF0003	Capsule	-	Staphylococcus aureus	Prevent phagocytosis	-	Antiphagocytosis	GE000007;GE002172
VF0014	Intercellular adhesion proteins	-	Staphylococcus aureus	PNSG is critical to biofilm elaboration, allowing bacteria to adhere to one another, and may also promote adherence to other molecules, such as ECM components	-	Adherence; Biofilm formation	GE000501;GE000678;GE001082
VF0024	Aureolysin	-	Staphylococcus aureus	Processing the precursor of V8 protease into an active form; modefying the bacterial cell surface proteins by specific inactivation of ClfB through cleavage of the N-terminal domain, thus may promote the detachment of bacaterial cells from colonized sites and facilitate the spread of infection; In vitro, aureolysin has been shown to cleave the human plasma proteinase inhibitors	-	Exoenzyme; Protease; Zinc metalloproteinase	GE000306
VF0025	FHA	Filamentous haemagglutinin	Bordetella pertussis	Required for adherence to ciliated respiratory epithelial cells, essential for overcoming mucociliary clearance; facilitates the phagocytosis	RGD (Arg-Gly-Asp) domain stimulates adherence to monocyte/macrophagesvia LRI/IAP(leukocyte response integrin/integrin associated protein) complex and CR3; carbohydrate-recognition domain (CRD) mediates attachment to ciliated respiratory epithelial cells; lectin-like activity for heparin and other sulfated carbohydrates can mediate adherence to non-ciliated epithelial cell lines. The heparin bindi…	Adherence; Two-partner secretion pathway (TPS)	GE002595;GE002596
VF0026	Ptx	Pertussis toxin	Bordetella pertussis	Attachment of B. pertussis to ciliated respiratory cells; Important immunogen; Activates cyclic adenosine phosphate (cAMP), histamine sensitising factor (HSF), lymphocytosis promoting factor (LPF), islet-activating protein (IAP), interferes with leucocyte function, haemolytic	Although specific receptors for Ptx have not been identified, many cell surface sialoglycoproteins may serve as PTX receptors. The toxin can also bind to glycoproteins, such as haptoglobin and fetuin, which have served as model proteins for PTX receptors.;The A protomer, consisting of the enzymatically active S1 subunit; the B oligomer, formed by the remaining S2-S5 subunits. The B oligomer binds…	Toxin; Intracellular toxin; ADP-ribosyltransferase; A-B type; Adherence; Type IV secretory protein	GE001873
VF0028	Cya	Invasive Adenylate cyclase /haemolysin	Bordetella pertussis	Bifunctional toxin harboring both adenylate cyclase and hemolytic activities;function primarily as an anti-inflammatory factor	Binds to <alpha>M<beta>2 integrin (CD11b/CD18, Mac-1, or CR3), activated by calmodulin and catalyzes the production of intracellular cAMP from ATP. This uncontrolled cAMP concentration leads to paralysis of the killing functions in phagocytic and immune effector cells	Toxin; Adenylate cyclase; RTX toxin	GE001722
VF0033	LPS	-	Bordetella pertussis	Prevents clearance of the organism by host surfactant protein; confers protection to the bacterium from complement-mediated cell lysis	-	Endotoxin	GE000976;GE002355;GE002458;GE002702;GE002710;GE003514;GE003714;GE003716
VF0034	Brk	Bordetella resistance to killing	Bordetella pertussis	Outer membrane protein that mediates adherence and resists complement	-	Serum resistance	GE003466;GE003982
VF0035	TTSS	Type III secretion system	Bordetella pertussis	The B. bronchiseptica TTSS modulates the host immune response, contributes to persistent colonization of the trachea	BopB, BopN, BopD, Bsp22 and BopC/BteA have been identified as type III secreted proteins; BopB and BopD are orthologues of the Yersinia YopB and YopD translocation proteins. BopB and BopD complex is responsible for the pore formation in the host plasma membrane that functions as the conduit for the transition of effector proteins into host cells; BopN is orthologous to YopN, which functions as a …	Secretion system; Type III secretion system	GE003103;GE003110;GE003771
VF0038	HMW1/HMW2	High-molecular-weight proteins	Haemophilus influenzae	The non-typeable H. influenzae HMW1 and HMW2 adhesins are related proteins that mediate attachment to human epithelial cells, an essential step in the pathogenesis of disease.	HMW1 mediates binding to human conjunctival cells through a glycoprotein receptor, which the target of HMW2 has not yet been defined	Adherence; Autotransporter; Nonfimbrial structure	GE003460
VF0043	Capsule	-	Haemophilus influenzae	Protecting the organism from phagocytosis and the bactericidial activity of complement	-	Antiphagocytosis	GE001356;GE002679
VF0049	HpuAB	-	Neisseria meningitidis	Haptoglobin-hemoglobin receptor, optimal binding and heme utilization require both proteins. Transport of heme iron by HpuAB requires the TonB system	-	Iron uptake; Heme uptake; Phase variation; Two-component TonB-dependent receptors	GE003561
VF0052	HP-NAP	Neutrophil activating protein	Helicobacter pylori	H.pylori Neutrophil activating protein, promoting the adhesion of human neutrophils to endothelial cells and the production of reactive oxygen radicals; inducing a very moderate state of inflammation that would promote H. pylori growth by the release of nutrient factors from the inflammed tissue	Binds to specific receptor which is coupled to a pertussis toxin-sensitive G protein, triggers the entry of calcium through plasma-membrane channels and through the activation of channels located on ER, which are opened by inositol-1,4,5-trisphosphate Ins(1,4,5)P3,produced by activated phospholipase C(PLC). The activated HP-NAP receptor also stimulates a phosphatidylinositol 3-kinase(PI3K) activi…	Proinflammatory effect	GE001403
VF0056	LPS	-	Helicobacter pylori	H. pylori LPS have much lower immunobiological activities than enterobacterial LPS, thus may prolong H. pylori infection for longer; mediates a lectin-like interaction with laminin, the binding may disrupt epithelial cell-basement membrane interactions contributing to the disruption of gastric mucosal integrity and the development of gastric leakiness associated with the bacterium	-	Endotoxin; Low toxicity; Adherence	GE000056;GE001001;GE001961;GE002832
VF0068	p60	-	Listeria monocytogenes	Murein hydrolase activity required for normal septum formation and essential for cell viability; may play a role in intestinal invasion and in vivo survival	-	Invasion	GE001771;GE001772;GE003969
VF0072	ClpC	-	Listeria monocytogenes	An ATPase promoting early escape form the phagosome of macrophages;ClpC is also required for adhesion and invasion, possibly by modulating the expression of InlA,InlB and ActA	-	Stress protein	GE001325
VF0073	ClpE	-	Listeria monocytogenes	An ATPase required for prolonged survival at 42 degree; acts synergistically with ClpC in cell division	-	Stress protein	GE002422
VF0074	ClpP	-	Listeria monocytogenes	Serine protease involved in proteolysis and is required for growth under stress conditions	-	Stress protein	GE003358
VF0075	Type IV pili	-	Neisseria meningitidis	Necessary for initial attachment, twitching motility and competence for natural transformation and autoagglutination	The membrane co-factor protein(MCP or CD46) has been proposed as a cellular receptor for pilus of both pathogenic Neisseria. CD46 is a transmembrane C3b/C4b-binding glycoprotein which functions to control the activation state and deposition of complement, and thereby protects host cells from damage caused by the human complement system	Adherence; Phase variation	GE001296
VF0082	Type IV pili	-	Pseudomonas aeruginosa	Attaches to host cells, but not to mucin, causing a twitching motility that allows the bacteria to move along the cell surface; biofilm formation	The C-terminal receptor-binding domain of pilin binds to asialoGM1 gangliosies on host cells. Generally, GM1 gangliosides contain a sialic acid moiety. P.aeruginosa produces a neuraminidase which removes sialic acid residues from the GM1 to form the asialoGM1, which is a better receptor for the pili; The asialoGM1 is present in increased abundance on the surface of cystic fibrosis respiratory epi…	Adherence; Twitching motility	GE000456;GE000979;GE001171;GE001172;GE001173;GE001174;GE001294;GE001298;GE001299;GE001400;GE001423;GE001424;GE001425;GE001426;GE001427;GE001428;GE001429;GE001598;GE001599;GE001765;GE001809;GE001867;GE001933;GE002184;GE002939;GE003062;GE003164;GE003235;GE003290;GE003504;GE003663;GE003669;GE003763;GE003849
VF0083	TTSS	Type III secretion system	Pseudomonas aeruginosa	Transports four known effector proteins: ExoS, ExoT, ExoU and ExoY, although most strains generally do not express all four at the same time	-	Secretion system; Type III secretion system	GE000610;GE001681
VF0084	xcp secretion system	-	Pseudomonas aeruginosa	Secretes toxins and enzymes into the extracellular fluid; need for proper localization of PilB and PilC	-	Secretion system; Type II secretion system	GE000990;GE000994;GE003666;GE003668;GE003670
VF0085	LPS	-	Pseudomonas aeruginosa	Mediates biological effects including resistance to serum killing and phagocytosis; the binding to normal CFTR (cystic fibrosis transmembrane conductance regulator) and invasion of host cells may make a contribution to virulence in the human eye; internalization by binding to normal CFTR protein expressed by airway epithelial cells followed by desquamation of bacteria-laden epithelial cells, cons…	Binding interaction occurs between the first extracellular loop of CFTR (predicted to be in amino acids 108-117 of the mature protein) and the complete outer portion of the core polysaccharide of the LPS	Adherence; Endotoxin	GE001079
VF0089	Rhamnolipid	-	Pseudomonas aeruginosa	The rhamnolipid solubilizes the surfactant, making it easier for the Plc to degrade the surfactant, thus may cause alveolar collapse	-	Biosurfactant	GE001916;GE004026
VF0091	Alginate	Mucoid exopolysaccharide	Pseudomonas aeruginosa	Allows the bacteria form biofilm; contributes to the persistence of the bacteria in the CF lung: act as an adhesin, preventing the bacteria from being expelled from the lung, and alginate slime layer makes it more difficult for phagocytes to ingest and kill the bacteria	-	Antiphagocytosis; Serum resistance	GE000901;GE000902;GE001432;GE002330;GE002331;GE002608;GE002717;GE002837;GE003001;GE003031;GE003071;GE003198;GE003707;GE003836;GE003837
VF0092	PLC	Phospholipase C	Pseudomonas aeruginosa	Degrading the phospholipid surfactant, which functions to reduce the surface tension so that the alveoli do not collapse completely when air leaves them during breathing	-	Toxin; Membrane-damaging; Phospholipase	GE003382
VF0094	Pyoverdine	-	Pseudomonas aeruginosa	Effective at acquiring iron from transferrin and lactoferrin; cytotoxic due to its ability to stimulating the production of reactive oxygen species	Pvd is a fluorescent dihydroxyquinoline derivative connected to a small peptide and contains hydroxamate and catecholate residues to chelate ferric ion, Fe (III). Pvd chelates Fe (III) in a 1:1 stoichiometry with high affinity (stability constant, 10**32); FpvA is the specific receptor for Fe(III)-pyoverdin	Iron uptake; Siderophore; Pigment	GE000044;GE000423;GE000800;GE000896;GE001124;GE001185;GE001580
VF0095	Pyochelin	-	Pseudomonas aeruginosa	Effective at promoting iron uptake in P. aeruginosa; catalyzes the formation of tissue-damaging free radicals; pyochelin also binds other transition metals (e.g. Mo(IV), Co(II)) with appreciable affinity and is implicated in the delivery of both Co(II) and Mo(IV) to P. aeruginosa cells	Pyochelin is a structurally unique siderophore possessing phenolate, but neither a hydroxamate nor a catecholate moiety. Pyochelin binds Fe (III) in a 2:1 stoichiometry with comparatively low affinity (stability constant, 10**5); FptA is the specific receptor for Fe(III)-pyochelin	Iron uptake; Siderophore	GE000058;GE000147;GE000937;GE001989;GE002340;GE002531;GE002944;GE003874
VF0100	Pyocyanin	-	Pseudomonas aeruginosa	Toxic to bacterial and eukaryotic cells due to the reactive oxygen intermediates it generates, such as superoxide radical and hydrogen peroxide	-	Pigment; Antimicrobial activity	GE002788;GE003051;GE003531
VF0101	Vi antigen	-	Salmonella enterica (serovar typhi)	Prevent antibody-mediated opsonization, increase resistance to host peroxide and resistance to complement activation by the alternate pathway and complement-mediated lysis	-	Immune evasion	GE002247;GE004013
VF0106	MgtBC	-	Salmonella enterica (serovar typhimurium)	MgtA and MgtB are not required for intracellular survival or for virulence, MgtC is essential for both functions	-	Magnesium uptake	GE003626
VF0109	SodCI	-	Salmonella enterica (serovar typhimurium)	Contribute to survival during systemic phase of infection	-	Stress protein	GE000458
VF0114	Flagella	-	Campylobacter jejuni	Penetrating the mucus barrier; chemotaxis is also important for intestinal colonization;In the absence of a type III secretion system, the flagellar secretion apparatus appears to secrete several putative virulence proteins including FspA, FlaC and up to eight Cia proteins	-	Motility; Chemotaxis; Invasion; Phase variation	GE001932;GE003147
VF0124	LPS	-	Shigella flexneri	Required for resistance to host defence and for the intracellular spread, but not for bacterial invasion	-	Endotoxin	GE001486;GE003715;GE004014
VF0129	Zot	Zona occludens toxin	Vibrio cholerae	Increases the permeability of the small intestinal mucosa by affects the structure of the tight junctions that bind mucosal cells together and preserve the integrity of the mucosal membrane; exhibits sequence homology to coat protein genes, very likely to be the coat proteins of CTX<phi>	-	Toxin	GE002271
VF0136	Yersiniabactin	-	Yersinia pestis	FyuA/Psn-Irp system uses yersiniabactin, a siderophore that can remove iron from a number of mammalian proteins, due to its extremely high affinity for ferric iron	YbtA is an AraC-like regulator required for transcription of fyuA/psn, irp2 and ybtP, also downregulate its own transcription; In the presence of iron, Fur, a cytosolic protein that on binding ferrous iron changes conformation and binds DNA at a specific site called a Fur box, thus preventing transcription, downregulates transcription of fyuA/psn, irp2 and other iron-regulated genes	Iron uptake; Siderophore	GE001692;GE002129
VF0140	TTSS	Type III secretion system	Yersinia pestis	Deliver Yop effectors into the cytosol of host cells to disturb the dynamics of the cytoskeleton and block phagocytosis by macrophages and PMNs, also impair the production of pro-inflammatory cytokines, chemokines. These actions allow the survival of the invading Yersinia and their extracellular multiplication in lymphoid tissues	-	Secretion system; Type III secretion system	GE003104;GE003114
VF0141	Capsule	-	Bacillus anthracis	Inhibits phagocytosis, and it is a monotonous linear polymer that is only very weakly immunogenic that enables the bacteria to evade the host-immune defenses and facilitate systemic invasion and dissemination within the bloodstream; produces a concentration dependent enhancement of the cytotoxicity of LT through an enhancement in the binding and accumulation of protective antigen to its receptors.	-	Antiphagocytosis	GE000559;GE001094;GE001965
VF0152	PspA	Pneumococcal surface protein A	Streptococcus pneumoniae	Inhibits complement activation and reduces the effectiveness of complement receptor-mediated clearance mechanisms by preventing the deposition of C3b on the cell surface; binds to lactoferrin, the iron starage glycoprotein predominantly located in mucosal secretions, may be involved in iron acquistion	PspA anti-complement function is attributed to the structural properties: dipole-like molecular; The electropositive end of the functional module of the molecule stabilizes the electronegative capsule; The other end of the functional module of PspA is electronegative and points away from pneumococci due to repulsive interactions with the electronegative capsule. This electronegative part of the P…	Complement resistance	GE000236;GE003691
VF0153	Mip	Macrophage infectivity potentiator	Legionella pneumophila	Necessary for intracellular survival	Belongs to the enzyme family of FK-506 binding proteins that exhibit the peptidyl-prolyl-cis/trans isomerase (PPIase) activity, catalyzes the isomerization of peptide bonds N-terminal to Pro residues	Enzyme	GE002249;GE002805;GE002838
VF0154	<i>lsp</i> T2SS	Type II secretion system	Legionella pneumophila	Critical for intracellular growth and virulence; transport two phosphatases, an RNAse, a zinc metalloprotease (Msp), mono-, di- and triacylglycerol lipases, phospholipase A, a lysophospholipase A and a p-nitrophenyl phosphorylcholine hydrolase.	-	Secretion system; Type II secretion system	GE003660
VF0155	Type IV pili	-	Legionella pneumophila	Contribute to complement-independent binding, perhaps as the ligand for protozoan lectin	-	Adherence	GE001295
VF0156	Dot/Icm	Defect in organella trafficking/intracellular multiplication	Legionella pneumophila	Allows survival and growth in macrophages, prevent phagosome acifidication and lysosome fusion, essential for induction of apoptosis in human macrophages	Assemble and activate a type IV secretion system in the bacterial membrane that exports plasmid and virulence factors to inhibit the phago-lysosome fusion and reprogram the Legionella-bearing vacuole; IcmS was shown to bind members of the SidE family (SidE, SdeA, SdeB, SdeC) and to be required for the export of SdeA; IcmW interacted with and was required for the translocation of additional Dot/Ic…	Secretion system; Type IV secretion system	GE000191;GE000636;GE001465;GE002689;GE003516
VF0157	Flagella	-	Legionella pneumophila	Not required for intracellular growth but enhance the invasion capacity	-	Motility	GE002437;GE002446;GE002448;GE002466
VF0159	Hsp60	-	Legionella pneumophila	Mediate a complement-independent attachment to mammalian and amoebal host cells	Specific receptors have not been identified	Adherence	GE000780
VF0160	FeoAB	-	Legionella pneumophila	A feoB mutant of L. pneumophila has a lowered Fe2+ uptake and is attenuated for intracellular growth	The FeoB protein is a G protein with properties of GTPase activity kinetics and GTP/GDP binding that differ from those of the eukaryotic proteins. The GTPase activity of FeoB is necessary for Fe2+ transport	Iron uptake; Ferrous iron uptake	GE002402;GE002554
VF0168	KatAB	-	Legionella pneumophila	A periplasmic catalase, expressed maximally during the postexponential phase; important for intracellular survival and transmission	-	Stress protein	GE003136
VF0169	SodB	-	Legionella pneumophila	A cytoplasmic iron superoxide dismutase; important for intracellular survival and transmission	-	Stress protein	GE000651;GE001856;GE002081
VF0170	SodC	-	Legionella pneumophila	A periplasmic copper-zinc superoxide dismutase; important for intracellular survival and transmission	-	Stress protein	GE000459
VF0207	Hemolysin	-	Escherichia coli (EHEC)	Cytotoxic to many types of cells: erythrocytes, granulocytes, monocytes, endothelial cells and renal epithelial cells; stimulating the release of IL-1<beta> and TNF	HylA frist binds a receptor on the cell surface, a <beta>2-integrin in leukocytes or glycophorin in red blood cells, then becomes inserted in the cell membrane. Calcium binding to the glycine-rich repeats is essential for toxin activity	Toxin; Membrane-damaging; Pore-forming; RTX toxin	GE002861;GE003860
VF0221	Type 1 fimbriae	-	Escherichia coli (UPEC)	Makes a important contribution to colonization of the bladder	FimH is the adhesin protein binding to mannose-containing glycoprotein receptors, known as uroplakins, that are located on the luminal surface of the bladder epithelial cells. This binding is followed by invasion of uroepithelia cells	Adherence; Invasion	GE003675
VF0225	Hemolysin	-	Escherichia coli (UPEC)	Cytotoxic to many types of cells: erythrocytes, granulocytes, monocytes, endothelial cells and renal epithelial cells; stimulating the release of IL-1<beta> and TNF	HylA frist binds a receptor on the cell surface, a <beta>2-integrin in leukocytes or glycophorin in red blood cells, then becomes inserted in the cell membrane. Calcium binding to the glycine-rich repeats is essential for membrane lysis	Toxin; Membrane-damaging; Pore-forming; RTX toxin	GE002862
VF0227	Chu	E. coli hemin uptake	Escherichia coli (UPEC)	Iron uptake: the ability to use heme and/or hemoglobin might be especially advantageous to pathogenic bacteria. These pathogens often secrete cytotoxins, which gain access to the intracellular heme reservoir besides initiating tissue invasion. Cytotoxin production coupled with the capability to utilize heme and/or hemoglobin could serve as an effective iron acquisition strategy during the progres…	-	Iron uptake; Heme uptake	GE000307;GE000360;GE000428;GE001149;GE002025;GE002246
VF0228	Enterobactin	-	Escherichia coli (UPEC)	Iron uptake: the siderophore enterobactin imported through the FepA receptor and the FepBCDG system	-	Iron uptake; Siderophore	GE000652;GE001009;GE001355;GE001482;GE003840
VF0230	IroN	-	Escherichia coli (UPEC)	Catecholate siderophore receptor, mediates utilization of the siderophore enterobactin	-	Iron uptake; Siderophore receptor	GE000208;GE000384;GE001245;GE001316;GE001405;GE001463;GE003795;GE004127
VF0236	OmpA	Outer membrane protein A	Escherichia coli (NMEC)	Contributes to brain mecrovascular endothelial cells (BMECs) invasion via a ligand-receptor interaction. Interaction of OmpA with its receptor induces actin condensation at the binding site. The actin reorganization induced by E. coli depends on activation of several host proteins involved in signaling, including focal adhesion kinase, PI3-kinase, PKC-<alpha>, and caveolin-1; OmpA also binds to C…	Binds to a 95-kDa HBMEC receptor, Ecgp, for E. coli invasion. OmpA-Ecgp interaction occurs via GlcNAc1,4-GlcNAc epitopes as well as the protein backbone of the receptor. The presence of Ecgp on human brain microvascular endothelial cell, but not on nonbrain endothelial cells. Ecgp is a gp96 (a cell surface glycoprotein related to heat shock proteins) homologue.	Invasion; Serum resistance	GE003571
VF0253	Isocitrate lyase	-	Mycobacterium tuberculosis	Required for persistant infection	Isocitrate lyase is the initial enzyme in the glyoxylate shunt, a secondary metabolic pathway that allows bacteria to utilize fatty acids as carbon and energy sources when the availability of primary carbon sources is limiting; Isocitrate lyase, in combination with malate synthase, catalyzes the conversion of isocitrate to malate, a reation that allows maintenance of the TCA cycle and synthesize …	Metabolic adaptation	GE000506;GE003308
VF0256	Shu	-	Shigella dysenteriae (serotype 1)	Shu heme utilization locus includes:; ShuA, TonB-denpendent heme receptor which is critical for the uptake of heme into the periplasm,; ShuT, putative periplasmic binding protein which specifically binds heme and acts as a soluble receptor for active uptake of heme into the cytoplasm; ShuU and ShuV comprise the cytoplasmic membrane permease and ATPase; ShuS, soluble cytoplasmic protein may functi…	-	Iron uptake; Heme uptake	GE001699;GE002078;GE002796
VF0268	HitABC	-	Haemophilus influenzae	HitABC(fbpABC) operon encodes a periplasmic-binding protein-dependent iron transport system necessary for the utilization of iron bound to transferrin or iron chelates	-	Iron uptake; ABC transporter	GE000193;GE001197;GE001551;GE002223;GE003556;GE003698;GE003790;GE003820;GE004073
VF0272	FbpABC	-	Neisseria meningitidis	Encodes a periplasmic-binding protein-dependent iron transport system necessary for the utilization of iron bound to transferrin or iron chelates, FbpA is the periplasmic Fe3+ binding protein	-	Iron uptake; ABC transporter	GE000431;GE001198;GE002013;GE002015;GE002234;GE003386;GE003387;GE003388;GE003552;GE003877;GE003934
VF0273	Flagella	-	Pseudomonas aeruginosa	Swimming motility; play a role in biofilm formation and other pathogenic adaptations	-	Adherence; Motility	GE002439;GE002440;GE002442;GE002444;GE002445;GE002449;GE002463;GE002464;GE002465;GE002472;GE002473;GE002474;GE002475;GE002476;GE002480;GE002481;GE002483;GE002729
VF0274	Capsule	-	Streptococcus agalactiae	Inhibits the binding of the activated complement factor C3b to the surface of S. agalactiae, preventing the activation of the alternative complement pathway and inhibits complement-mediated opsonophagocytosis	-	Antiphagocytosis; Serum resistance	GE001415;GE002708
VF0286	PhoP	-	Mycobacterium tuberculosis	Senses Mg2+ starvation, controls expression of genes involved in surface remodeling and adaptation to intracellular growth	-	Regulation	GE001064;GE001288;GE001390;GE003223;GE003365;GE003550;GE003623;GE004108
VF0287	RelA	-	Mycobacterium tuberculosis	Associated with stationary phase adaptation and long-term survival	Produce ppGpp (guanosine 5'-diphosphate 3'-diphosphate), an 'alarmone' that suppresses synthesis of stable RNA, induces degradative pathways and modulates expression of genes involved in DNA replication	Regulation	GE001156;GE001413;GE003258
VF0291	Legiobactin	-	Legionella pneumophila	A nonhydroxamate, nonphenolate siderophore	-	Iron uptake; Siderophore	GE001345;GE001346;GE002625;GE003230
VF0292	CcmC	-	Legionella pneumophila	Required for cytochrome c production, promotes iron assimilation and intracellular infection	-	Iron uptake	GE002139;GE002720
VF0293	IraAB	-	Legionella pneumophila	IraA, a methyltransferase, is critical for virulence; IraB, a homologue of di- and tri-peptide transporters, may involved in a novel method of iron acquisition which may utilize iron-loaded peptides	-	Iron uptake	GE000690;GE002930
VF0300	IdeR	Iron-dependent regulator	Mycobacterium tuberculosis	Repressor of iron acquisition genes, activator of iron storage genes and a posistive regulator of oxidative stress responses	-	Regulation	GE002192
VF0301	HspX	16-kDa <alpha>-crystallin-like protein	Mycobacterium tuberculosis	ATP-independent chaperone, associated with stationary phase, induced under RNI stress and is an immunodominant antigen that is necessary for survival in macrophages. This protein can stablize cell structure during long-term survival and permit the bacilli to survive within the low-oxygen environment of the granuloma.	-	Heat-shock protein	GE003292
VF0307	LipF	-	Mycobacterium tuberculosis	Annotated as a lipase/esterase, dramatically upregulated at low pH, a possible function of lipF could be to hydrolyze toxic fatty acids present in caseous necrotic debris during tuberculosis or it may modify the external cell wall as an adaptive response to acid damage	-	Metabolic adaptation	GE000310;GE000631
VF0315	ESX-1	ESAT-6 secretion system-1	Mycobacterium tuberculosis	ESX-1 is required for survival of mycobacteria in vivo;required for (initiation of) granuloma formation; essential for escape from phagosomes into cytosol;essential for cell lysis and cell-to-cell spreading;required for phagosome maturation;essential for induction of immunosuppressive type I interferons and represses conjugation in donor cells (M. smegmatis)	-	Secretion system; Type VII secretion system	GE003475
VF0321	TTSS(SPI-2 encode)	Type III secretion system	Salmonella enterica (serovar typhimurium)	Secretes effector proteins to facilitate the replication of intracellular bacteria within membrane-bound Salmonella-containing vacuoles (SCVs)	Translocon protein: SseB, SseC and SseD. SseB is similar to EspA of EPEC; chaperon protein: SseA (chaperon for SseB and SseD), SscA, SscB; effector proteins:; SpiC, encoded within SPI-2, small acidic protein to exclude host cell protein TassC from assocation with SCV. SpiC is also necessary for secretion of translocon protein SseB, SseC and SseD, and other effector protein. Its role as an effecto…	Secretion system; Type III secretion system	GE003937
VF0322	CadF	Campylobacter adhesion to fibronectin	Campylobacter jejuni	37 kDa outer-membrane protein mediating the binding of the organism to the extracellular matrix component fibronectin, which in turn stimulates a signal transduction pathway	-	Adherence; FnBP	GE001382;GE002898;GE003394
VF0323	Capsule	-	Campylobacter jejuni	Play an important role in bacterial survival and persistance in the enviroment and evasion of host immune response; the presence of heptose residues in the capsule may be important for virulence. Heptose residues found in some cell surface-located glycoconjugates are required for adhesion	-	Adherence; Phase variation	GE001051;GE001128;GE001233;GE001555;GE002142;GE002375;GE002462;GE002579;GE002771;GE002997;GE003126
VF0326	LOS	Lipooligosaccharide	Campylobacter jejuni	LOS diversity is important for the ability to colonize a wide variety of hosts and intestinal niches; the ability to generate variation at high frequency, the molecular mimicry evident in LOS structure support a role in the avoidance of host defences;the similarity of LOS structures to host gangliosides and the subsequent ability to generate crossreacting antibodies forms the pathological basis f…	-	Adherence; Phase variation; Structural mimicry	GE003896
VF0333	T2SS	Type II secretion system	Shigella dysenteriae	Still unknown.	-	Secretion system; Type II secretion system	GE000988;GE000989;GE000992;GE003664
VF0334	HSI-I	Hcp1 secretion island I	Pseudomonas aeruginosa	Play role in chronic P. aeruginosa infections	Encoding a protein secretion apparatus for exporting Hcp1, a hexameric protein that forms rings with 40 angstrom internal diameter; a ClpB-like AAA+ family protein, ClpV1, forms a core component of this secretion apparatus and is likely to provide the energy for translocation of Hcp1	Secretion system; Type VI secretion system	GE000005;GE003348;GE003758
VF0335	T6SS	-	Vibrio cholerae	Antibacterial and antienkaryotic activities	VgrG1 carries an enzymatically active domain that is capable of cross-linking actin in eukaryotic cells; three effector-immunity pairs are identified so far, TseL-TsiV1, VasX-TsiV2, VgrG3-TsiV3	Secretion system; Type VI secretion system	GE003965
VF0337	Pht	Phagosomal transporter	Legionella pneumophila	Enables transmissive L. pneumophila to assess their phagosomal nutrient supply before reentering the cell cycle	PhtA contains 12 transmembrane domains characteristic of the Major Facilitator Superfamily (MFS) of transporters, was shown to transport threonine, an essential amino acid fro L. pneumophila maturation to the replicative phase	Nutrient acquisition; Transporter	GE000107;GE001160
VF0344	TTSS	Type III secretion system	Chlamydia trachomatis	Translocating different effectors into the host cell, depending on the phase of the developmental cycle	Chlamydial TTS effectors include translocated actin-recruiting phosphoprotein (Tarp), Ser/Thr protein kinase (Pkn5), negative regulator of TTS (CopN), inclusion membrane proteins IncA, IncB and IncC. The Tir-like effector protein Tarp might function as a receptor for an unidentified chlamydial intimin analog and mediate the recruitment of actin to the C. trachomatis inclusion. Tarp is activated u…	Secretion system; Type III secretion system	GE002754
VF0351	Lsp	-	Listeria monocytogenes	A lipoprotein-specific signal peptidase SPase II, responsible for the maturation of lipoproteins in listerial pathogenesis; the deletion mutant failed to process several lipoproteins and the mutant bacteria are clearly impaired in phagosomal escape	-	Peptidase	GE003185
VF0356	Cytolysin	-	Enterococcus faecalis	Capable of lysing erythrocytes, polymorphonuclear leukocytes and macrophages, as well as a broad range of gram-positive bacteria	-	Toxin; Hemolysin/bacteriocin; Biofilm formation	GE002719;GE002877;GE003671;GE004135
VF0361	Capsule	-	Enterococcus faecalis	Contributes to host immune evasion	Masks bound C3 from detection on the surface of E. faecalis; masks lipoteichoic acid from detection	Antiphagocytosis	GE000763;GE002965;GE002966
VF0362	BopD	-	Enterococcus faecalis	Homologous to a sugar-binding transcriptional regulator involved in biofilm production; The actual role is unknown, but the association of enhanced biofilm formation in the presence of glucose and the possible involvement of a sugar-binding transcriptional regulator suggest a linkage to increased biofilm production in E. faecalis in the presence of specific carbohydrates	-	Biofilm formation	GE000089;GE000119;GE000414;GE001002;GE001059;GE001247;GE001888;GE001984;GE002152;GE002833
VF0365	VirB type IV secretion system	-	Brucella melitensis	The Brucella VirB type IV secretion apparatus is not required for early survival stages, like LPS or cyclic <beta>-1,2-glucan are, but rather for late Brucella containing vacuole (BCV) maturation events corresponding to sustained interaction and fusion with the endoplasmic reticulum (ER).	Brucella initiates interactions with Sar1/COPII-dependent ERES (ER exit sites), the early secretory pathway. Unlike Legionella, that intercepts COPI-dependent vesicular trafficking from the ER for the biogenesis of its ER-derived replicative organelle; The acidified Brucellacontaining vacuole (BCV) interacts with late endosome/lysosomes, acquiring markers such as LAMP-1, CD63 and Rab7. Subsequent…	Secretion system; Type IV secretion system; Intracellular survival and replication	GE000326;GE001274;GE001872;GE001875;GE001876;GE001877;GE001878;GE001879
VF0366	C<beta>G	Cyclic <beta>-1,2 glucan	Brucella melitensis	Brucella cyclic <beta>-1,2-glucan could interfere with the maturation of the bacterial vacuole by disrupting cholesterol-rich lipid rafts present on phagosomal membranes and consequently prevent the Brucella containing vacuole (BCV) to fusion with lysosomes, and allowing Brucella to reach an endoplasmic reticulum-derived vacuole permissive for bacterial replication	Periplasmic homopolysaccharides that is structurally similar to cyclodextrins and is capable of extracting cholesterol from cellular membrane.	Intracellular survival	GE000063;GE002333
VF0367	LPS	Lipopolysaccharide	Brucella melitensis	Plays a role in entry and early survival inside macrophages;Resistance to innate-immunity anti-bacterial responses;a modulator of the immune response	The entry and early survival stages of smooth Brucella are lipid-raft-dependent. The entry-gateway seems to include Brucella surface-exposed HSP60-PrPc (cellular prion protein) interaction but also a SR-A (class A scavenger)-lipid-A interaction and is also dependent on the LPS O-chain. And the LPS O-chain ensures the Brucella containing vacuole (BCV) aviodance of fusion with lysosomes transiently…	Intracellular survival; Intracellular entry; Immuno-modulatory activity	GE001561;GE002701;GE002830;GE003723;GE003906
VF0369	VirB/VirD4 type IV secretion system	-	Bartonella henselae	Crucial for establishment of infection in the primary niche- the endothelial cells, required for colonization of endothelial cells, by mediating the intracellular delivery of effector proteins (BepA-BepG). Translocation of the Beps provokes distinct cellular phenotypes: (i) a massive cytoskeleton rearrangement, resulting in the engulfment of bacterial aggregates (a phenotype called 'invasome' for…	The Bartonella-translocated effector protein (BepA-BepG) are required for invasion, proinflammatory activation and antiapoptotic protection of endothelial cells. The C terminus of each Bep harbours at least one copy of the novel Bep intracellular delivery (BID) domain and a short, positively charged tail sequence. The bipartite C terminus is required for protein transfer, their N-terminal region …	Secretion system; Type IV secretion system	GE001874
VF0389	mu-toxin	-	Clostridium perfringens	Hyaluronidases will facilitate the degradation of polysaccharides such as hyaluronic acid and chondroitin sulfate and help the organism to spread into deeper tissues. Hyaluronidase has been referred to as a spreading factor that decreases viscosity of ground substance in the connective tissue, and the variation in the C-terminal sequences of the hyaluronidases may represent their substrate.	-	Exoenzyme; Carbohydrate-active enzyme; Hyaluronidase	GE002361
VF0392	O-antigen	-	Yersinia enterocolitica	LPS O antigen mutants were severely impaired in their ability to colonize the Peyer's patches and did not colonize spleen and liver. The absence of O antigen in the outer membrane affects the expression of other Yersinia virulence factors.	-	-	GE000666;GE002374;GE002376;GE003706;GE003709;GE003720
VF0394	Flagella	-	Yersinia enterocolitica	Required for efficient cellular invasion.; YplA, a phospholipase is secreted by this type III flagellum secretion system. YplA is required for survival of Y. enterocolitica in the Peyer's patches and for stimulation of the acute inflammatory response of the host to the infection.	-	Secretion system; Invasion; Motility	GE002450;GE003894;GE003930
VF0398	ShdA	-	Salmonella enterica (serovar typhimurium)	ShdA-mediated binding of the extracellular matrix contributes to persistent intestinal carriage	A large outer membrane protein of the autotransporter family whose passenger domain binds the extracellular matrix proteins fibronectin and collagen I, possibly by mimicking the host ligand heparin.	Adherence; Nonfimbrial; Autotransporter	GE002365
VF0403	Type VII secretion system	-	Staphylococcus aureus	ESAT-6-like secretion system (Ess) encoded by a cluster of eight genes in S. aureus. The FSD (FtsK/SpoIIIE domain) membrane protein EssC is essential for the secretion of EsxA-EsxB. EssA and EssB that encode transmembrane proteins are also involved in secretion. The secretion of EsxA is dependent on the presence of EsxB and vice versa. The co-dependence is similar to that of ESAT-6 and CFP-10 in …	-	Secretion system; Type VII secretion system	GE002417
VF0408	T3SS1	-	Vibrio parahaemolyticus	T3SS1 uses a multifaceted mechanism to cause the cytotoxicity of host cells, involving the induction of autophagy, cell rounding, and cell lysis.	The T3SS1 effector VopS could act to covalently modify a conserved threonine residue on Rho, Rac, and Cdc42 with adenosine 5隆盲-monophosphate (AMP). The resulting AMPylation prevented the interaction of Rho GTPases with downstream effectors, thereby inhibiting actin assembly in the infected cell.	Secretion system; Type III secretion system	GE003100;GE003101;GE003112;GE003113
VF0409	T3SS2	-	Vibrio parahaemolyticus	T3SS2 is associated with enterotoxicity	VopT is a ADP-ribosyltransferase effector protein secreted via the T3SS2, VopT ADP-ribosylates Ras both in vivo and in vitro. VopT shows approximately 45% and 44% identity with the ADP-ribosyltransferase (ADPRT) domain of ExoT and ExoS, respectively, which are two T3SS-secreted effectors of Pseudomonas aeruginosa.;T3SS2 effector VopL encoding three Wiskott-Aldrich homology 2 (WH2) domains that ar…	Secretion system; Type III secretion system	GE000379;GE001099
VF0410	LLS	Listeriolysin S	Listeria monocytogenes	Haemolysin LLS is post-translationally modified and belongs to a family of modified virulence peptides, including streptolysin S and several as-yet uncharacterized members of the same family in other pathogens.	-	Toxin; Pore-forming	GE000510;GE002842
VF0414	RicA	Rab2 interacting conserved protein A	Brucella melitensis	Specifically interacts with GDP bound form of Rab2. the RicA-Rab2 interaction may affect the maturation of the Brucella-containing vacuole in a way that slows intracellular replication, thereby contributing to the evasion of the innate immune system.	-	Intracellular survival	GE000602
VF0426	P97/P102 paralog family	-	Mycoplasma hyopneumoniae	Binds glycosaminoglycans, plasminogen, and fibronectin and perform essential roles in colonization of ciliated epithelia	-	Adherence	GE003377
VF0428	Bsa T3SS	-	Burkholderia pseudomallei	Delivering effector proteins into host cells to manipulate host cell functions	Three effectors: BopE, homolog of SopE and SopE2 of Salmonella, functions as GTPase involving bacterial invasion. BopA, homolog of IcsB of Shigella, suppresses autophagy. BopC, function unkown.	Secretion system; Type III secretion system; Invasion	GE000374;GE000503;GE001067;GE002182;GE002252;GE002453;GE003098;GE003215;GE003502;GE003695
VF0430	Flagella	-	Burkholderia pseudomallei	Polar flagella required for motility and macrophage invasion	-	Invasion	GE000892;GE001651;GE001652;GE002441;GE002447;GE002468;GE002505;GE002518;GE002521;GE002522;GE003157;GE003813;GE003846
VF0432	CdpA	-	Burkholderia pseudomallei	A major c-di-GMP-specific phosphodiesterase in regulating intracellular levels of c-di-GMP, affecting diverse phenotypes such as flagellum synthesis, bacterial motility, the production of exopolysaccharides, cell-to-cell aggregation, biofilm formation, cytotoxicity, and invasion of human cells.	-	Signaling; Intracellular signaling	GE000507;GE000891;GE001653;GE001715;GE001821;GE002067;GE002085;GE002366;GE002429;GE002431;GE002478;GE002479;GE002524;GE002610;GE002962;GE003259;GE003917;GE004038
VF0433	Quorum-sensing	-	Burkholderia pseudomallei	-	B. pseudomallei encodes three luxI homologs that produce as many as seven quorum-sensing molecules, including C8-HSL (N-octanoyl-L-Homoserine lactone), 3-hydroxy-C8-HSL, 3-oxo-C8-HSL, C10-HSL, 3-hydroxy-C10-HSL, 3-oxo-C10-HSL, 3-hydroxy-C12-HSL, and 3-oxo-C14-HSL. It also has five luxR homologs to sense these signals.;The LuxIR system consists of the AHL (N-acyl-homoserine lactone) synthase LuxI,…	Signaling; Intercellular signaling	GE001534
VF0435	BoaB	Burkholderia oligomeric coiled-coil adhesin B	Burkholderia pseudomallei	Function as adhesins in vitro and to contribute to B. pseudomallei replication inside macrophage-like cells	-	Adherence; Autotransporters; Trimeric autotransporters	GE003672
VF0436	Capsule I	Type I O-polysaccharide	Burkholderia pseudomallei	A key virulence determinant and that loss of capsule production results in severe attenuation in animal models of disease	Plays a role in reducing B. pseudomallei phagocytosis by host cells by preventing complement factor C3b deposition on the surface of the bacterium	Antiphagocytosis	GE000644;GE000661;GE001567;GE003263;GE003390;GE003722;GE003765
VF0441	OatA	-	Listeria monocytogenes	An Listeria peptidoglycan modifying enzyme that acetylates muramic acid residues of L. monocytogenes peptidoglycan critical for the bacterial survival in infected hosts	-	Immune evasion	GE002312;GE004025
VF0442	PgdA	-	Listeria monocytogenes	An Listeria peptidoglycan modifying enzyme that deacetylates the N-acetylglucosamine residues of L. monocytogenes peptidoglycan and confers resistance to lysozyme	-	Immune evasion	GE000225;GE001048
VF0449	PrsA2	-	Listeria monocytogenes	Required for virulence and contributes to the integrity of the L.monocytogenescell wall as well as swimming motility and bacterial resistance to osmotic stress	PrsA2 is a critical post-translocation secretion chaperone. It is a member of a family of membrane-associated lipoproteins that contribute to the folding and stability of secreted proteins as they cross the bacterial membrane	Intracellular growth; Protein folding	GE000039;GE003354;GE003536
VF0450	FarAB	Fatty acid resistance system	Neisseria meningitidis	Mediates the resistance to antimicrobial long-chain fatty acids	-	Efflux pump	GE000154;GE000925;GE001504;GE001991;GE002010;GE002011;GE002935;GE002936
VF0451	MtrCDE	Multiple transferable resistance system	Neisseria meningitidis	A tripartite multidrug efflux pump essential for resistance to <beta>-lactams (penicillin G and nafcillin), macrolides (erythromycin), and host-derived compounds (peptide LL-37 and progesterone and essential for growth of gonococci in the lower genital tract of experimentally infected female mice	-	Efflux pump	GE000019;GE001080;GE001235;GE001676;GE002216;GE002891
VF0454	KatA	-	Neisseria meningitidis	Detoxifies H2O2; Protects against ROS (Reactive oxygen species), a family of chemical that are oxidized version of molecular oxygen, including hydrogen peroxide, superoxide and hydroxyl radicals	-	Stress protein	GE003234;GE004067;GE004113
VF0456	MsrAB	Methionine sulphoxide reductase	Neisseria meningitidis	Repairs oxidized proteins	-	Stress protein	GE003500;GE003811
VF0457	RecN	-	Neisseria meningitidis	Recombinational repair protein that protects against ROS and non-oxidative killing by neutrophils	-	Stress protein	GE002871
VF0461	Csu fimbriae	-	Acinetobacter baumannii	Plays a role in the initial steps of biofilm formation by allowing bacterial cells to adhere to abiotc surfaces and initiate the formation of microcolonies that precede the full development of biofilm structures	-	Biofilm formation	GE002954;GE002955;GE002956;GE002957;GE002959
VF0463	BfmRS	-	Acinetobacter baumannii	Controls biofilm formation and cellular morphology;participates in cell adhesion, resistance to serum killing and antibiotic susceptibility	Activates the expression of the ushere chaperone assembly system responsible for the production of pili needed for biofilm formation on polystyrene surfaces;inactivation of bfmS may affect the regulatory process and/or translational modification of OmpA leading to loss of OmpA-mediated pathogenesis	Regulation; Two-component system	GE000739;GE000740;GE001020;GE001021;GE001070;GE001225;GE001661;GE001993;GE002533;GE003156;GE003175;GE003222;GE003549;GE004055;GE004056
VF0467	Acinetobactin	-	Acinetobacter baumannii	High-affinity catechol-hydroxamate siderophore competing with host cells for iron	-	Iron uptake; Siderophore	GE000812;GE002697;GE003641;GE003656
VF0469	Phospholipase D	-	Acinetobacter baumannii	Contribute to the pathogenesis by aiding in the lysis of host cells, via cleavage of phospholipids present in the host cell membrane, and by degrading phospholipids present at mucosal barriers to facilitate bacterial invasion	Lipolytic enzyme that catalyzes the cleavage of phospholipids	Enzyme	GE000011;GE000161;GE000242;GE000444;GE000558;GE001650
VF0470	Phospholipase C	-	Acinetobacter baumannii	Contribute to the pathogenesis by aiding in the lysis of host cells, via cleavage of phospholipids present in the host cell membrane, and by degrading phospholipids present at mucosal barriers to facilitate bacterial invasion	Lipolytic enzyme that catalyzes the cleavage of phospholipids	Enzyme	GE001361
VF0472	PNAG	-	Acinetobacter baumannii	Critical for biofilm formation	-	Biofilm formation	GE003830;GE004166
VF0474	Lateral flagella	-	Aeromonas salmonicida	Inducible lateral peritrichous flagellar system is responsible for movement across solid surfaces or through viscous environments known as swarming motility;glycosylation of the lateral flagellin is essential for swarming motility over surfaces	-	Motility; Colonization	GE002443
VF0479	T3SS	-	Aeromonas salmonicida	A needle-like structure, often described as an "injectisome" that can inject effectors directly into the cytoplasm of target cells; five effectors have been described: AexT, AexU, AopP, AopH and AopO;AexT and AexU are bifunctional toxins that contain a GTPase activating domain, allowing the interruption of host cell-signalling pathways and an ADP-ribosylating domain that can disrupt the host cyto…	-	Secretion system; Type III secretion system	GE001100;GE001705;GE003106;GE003109;GE003508;GE003769;GE004097
VF0487	Rvh T4SS	-	Anaplasma phagocytophilum	Secretes virulence factors that are responsible for subverting innate immunity and inhibiting host cell apoptosis	Two effectors have been identified and partially characterized so far: the ankyrin repeat domaincontaining protein, AnkA and the Anaplasma translocated substrate 1, Ats-1;AnkA and Ats-1 contain eukaryotic protein motifs and are uniquely evolved in the family Anaplasmataceae;AnkA is secreted into the host cell cytoplasm and binds the adaptor protein Abi-1, which recruits and activates Abl-1 tyrosi…	Secretion system; Type IV secretion system; Type IVa	GE000328;GE000947;GE001870
VF0504	AdeFGH efflux pump	-	Acinetobacter baumannii	Play a potential role in the synthesis and transport of autoinducer molecules during biofilm formation	-	Biofilm formation	GE000155;GE000677;GE000679;GE001234;GE002012;GE002215;GE002893;GE002894;GE002937;GE003947;GE004072
VF0513	IlpA	Immunogenic lipoprotein A	Vibrio vulnificus	Dual functions as an adhesin and an immunostimulant	A lipoprotein that stimulates production of proinflammatory cytokines via TLR2 in human monocytes; involved in bacterial adherence to host cells	Adherence	GE003788
VF0521	ESX-3	-	Mycobacterium tuberculosis	Required for siderophore-mediated iron acquisition	-	Secretion system; Type VII secretion system	GE002364;GE003474;GE003477
VF0560	Capsule	-	Klebsiella pneumoniae	Assisting in evading the host immune system by protecting bacteria from opsonophagocytosis and serum killing	-	Immune evasion; Antiphagocytosis	GE000975;GE001897;GE001899;GE002242;GE003710;GE003719
VF0561	LPS	-	Klebsiella pneumoniae	Resistant to serum complement; also play a role in protecting bacteria from antimicrobial peptides, including polymyxin antibiotics	-	Serum resistance; Endotoxin	GE003653;GE003725;GE003726;GE003858
VF0562	Ent	Enterobactin	Klebsiella pneumoniae	May be necessary for penetration to deeper tissues	-	Iron acquision; Siderophore	GE000573;GE000787;GE001057;GE001101;GE001352;GE001353;GE001956;GE003881;GE004027
VF0563	Sal	Salmochelin	Klebsiella pneumoniae	A major trigger of inflammation and bacterial dissemination induced during K. pneuminiae lung infection	Inducing dissemination through chelation of host cellular iron, leading to inactivation of iron-dependent prolyl hydroxylases and the master transcription factor hypoxia inducible factor-1<alpha> (HIF-1<alpha>) stabilization in lung epithelial cells. HIF-1<alpha> controls vascular permeability and inflammatory gene expression	Iron acquision; Siderophore	GE001227;GE001328;GE001783;GE001950;GE002774
VF0564	Ybt	Yersiniabactin	Klebsiella pneumoniae	The phenolate siderophore Ybt contributes to evasion of the activity of lipocalin2 in the lung 聳 a host factor which neutralizes enterobactin-based iron acquisition	-	Iron acquision; Siderophore	GE000650;GE001348;GE002662;GE003162;GE003302;GE003317;GE003522
VF0565	Aerobactin	-	Klebsiella pneumoniae	Citrate-hydroxamate siderophore aerobactin is needed for successful infection by hypervirulent K. pneumoniae in pneumonic infections	-	Iron acquision; Siderophore	GE001344
VF0566	Type I fimbriae	-	Klebsiella pneumoniae	Adhering to human mucosal or epithelial surfaces	-	Adherence	GE000916
VF0568	AcrAB	-	Klebsiella pneumoniae	May mediate resistance against host-derived antimicrobial peptides; associated with antibiotic resistance	-	Efflux pump	GE000680;GE001674;GE001675;GE001985;GE001986;GE002217;GE003948;GE003949
VF0571	RcsAB	Regulation of capsule synthesis	Klebsiella pneumoniae	RcsB combined with the unstable auxiliary regulator RcsA to bind to an RcsAB box in the promoter region to upregulate the cps genes expression	-	Regulation	GE000045;GE004070
VF0572	Allantion utilization	-	Klebsiella pneumoniae	Providing a nitrogen source to increase virulence in K. pneumoniae at certain sites of infection	Allantoin is a metabolic intermediate of purine degradation by various organisms including microbes and has been indentified as a source of nitrogen in various bacterial species and as both a nitrogen source and a carbon source in K. pneumoniae.	Nutritional factor	GE000057;GE000504;GE000553;GE000566;GE000628;GE000750;GE000966;GE001084;GE001157;GE001264;GE001393;GE001813;GE002102;GE002636;GE002652;GE002860;GE003496
VF0573	Colibactin	-	Klebsiella pneumonia	Inducing DNA damage	Directly generating DNA interstand cross-links	Toxin; Genotoxin	GE000027;GE000202;GE000486;GE000514;GE000539;GE000560;GE000821;GE001476;GE001479;GE001628;GE001720;GE001919;GE002410;GE002826;GE002906;GE003072;GE003077;GE003138;GE003321;GE003395;GE003407;GE003588;GE004182
